# Modelling the effects of lymph node swelling on T-cell response

Sarah C Johnson<sup>1</sup>, Jennifer Frattolin<sup>1</sup>, Lowell T. Edgar<sup>1</sup>, Mohammad Jafarnejad<sup>2</sup>, James E. Moore Jr.<sup>1</sup>

**1** Department of Bioengineering, Imperial College London, London, United Kingdom  
**2** Department of Biomedical Engineering, Johns Hopkins University School of Medicine, Baltimore, MD, USA

\* james.moore.jr@imperial.ac.uk

## Abstract

Swelling of the lymph nodes is commonly observed during the adaptive immune response, yet its impacts on T cell trafficking and subsequent immune response are not well known. To better understand the effect of macro-scale alterations in the lymph node, we developed an agent-based model of the lymph node paracortex, describing T cell trafficking and response to antigen-presenting dendritic cells alongside swelling-induced changes in T cell recruitment and egress, and regulation of expression of egress-modulating T cell receptor Sphingosine-1-phosphate receptor-1. Validation of the model was achieved with *in-silico* replication of a range of published *in-vivo* and cell culture experiments. Analysis of CD4<sup>+</sup> and CD8<sup>+</sup> effector T cell response under varying swelling conditions showed that paracortical swelling aided initial T cell activation but could inhibit subsequent effector CD8<sup>+</sup> T cell production if swelling occurs too early in the T cell proliferative phase. A global sensitivity analysis revealed that the effects of some parameters switch from aiding to inhibiting T cell response over a ten day response period. Furthermore, temporarily extending retention of newly differentiated effector T cells, mediated by Sphingosine-1-phosphate receptor-1 expression, mitigated some of the effects of early paracortical swelling. These results

suggest that targeting the timing of lymph node swelling and temporary effector T cell retention may offer new ways to manipulate immune response.

## Author summary

Within the lymph nodes the interaction of T cells and antigen presenting cells play a crucial role in initiating the adaptive immune response, resulting in effector T cells that travel to the infection site. Accompanying swelling of lymph nodes is commonly observed, yet the impact on T cell trafficking through the node and the subsequent immune response are not well known. We developed a novel agent-based model of a lymph node, describing immune response-induced expansion, contraction and changes in T cell recruitment and egress. We also describe the regulation of T cell expression of the Sphingosine-1-phosphate receptor-1, which is known to play an important role in T cell trafficking. We found that although swelling aids T cell activation, too early an increase in paracortical volume hinders the CD8+ effector T cell response. We also found that temporarily maintaining the down-regulation of Sphingosine-1-phosphate receptor-1 expression on newly differentiated effector T cells greatly increased the overall effector T cell output, and could counteract the loss in effector TC production due to early swelling. Our findings suggest that targeting the timing of lymph node swelling and temporary effector T cell retention may offer new ways to manipulate immune response.

## Introduction

The lymphatic system is a converging network of organs and lymphatic vessels (LVs) that maintains fluid balance in the body and also delivers crucial antigen information to lymph nodes (LNs) for initiation of adaptive immunity. A successful immune response relies not only on the interaction of different immune cell types, but also on the maintenance of an appropriate physical environment in the LNs to facilitate those interactions. LNs contain specific compartments populated by T cells (TCs), B cells, fibroreticular cells (FRCs), some of which are lined by lymphatic endothelial cells (LECs) [1, 2]. When antigens are presented (either suspended in lymph or as captured by incoming antigen presenting cells), the LNs physical environment change over time.

Swelling of LNs is a well-known consequence, but the effects of swelling on the processes crucial for adaptive immunity are not well understood.

Expansion of LNs depends on the presence and activity of Dendritic Cells (DCs), B cell signalling and TC residence time in the LNs [3–5]. In the initial days, TC exit rate falls, blood flow to the LNs increases, and inflammatory signalling results in a 3-5 fold increase in TC recruitment [6–8]. Mass of LNs increases 2-5-fold, accompanied by a similar increase in cellularity, while in the first 48-96 hours, the FRCs elongate, allowing accommodation of increases in the size of the LNs [9–11]. Proliferation of stromal cells lags behind the increase in immune cells but subsequent proliferation of LECs and FRCs allow maintenance of the LNs architecture during further expansion [5, 11, 12]. The blood vessels of the LNs also grow, increasing blood vessel volume roughly proportional to overall volume of the LNs, accompanied by further TC recruitment [4, 7, 13].

Between 2 and 5 days post-immunisation, the number of antigen-presenting DCs in the LNs peaks, TC activation and proliferation is underway and TC egress increases 3-6 fold [5, 9, 14, 15]. Expansion of the medullary and SCS areas has also been observed, which aids in the increase in TC egress rate [16]. Recruitment of TCs then declines, HEV, FRC and TC proliferation subsides, remaining effector TCs may undergo apoptosis and the LNs return to their baseline volume [13]. Following a primary response, FRC, LEC and blood vessel endothelial cell numbers remain elevated within denser LNs structures for at least a month [12].

To pass through these phases, the underlying antigenic simulation must be sufficient to trigger lymphocyte retention, activation and proliferation while a successful immune response occurs when TCs further differentiate into effector cells and migrate out of the LNs [17]. Migrating DCs cross the SCS floor in a chemokine and integrin-aided fashion and migrate into the paracortex [18]. TCs and B Cells mainly enter the LNs by transmigrating from blood vessels in the paracortex [19]. Typically 1 in 10,000 TCs express a complementary TC receptor to the antigen fragment presented by DCs within a MHCI (to CD8<sup>+</sup> TCs) or MHCII (CD4<sup>+</sup> TCs) molecule [20, 21]. Naive cognate TCs initially make short contacts with DCs, but after around 8 hours, progress to longer interactions (>1hr) before returning to short interactions as TCs activate and divide [22]. With sufficient affinity and stimuli, TCs undergo activation, secrete inflammatory and activation-facilitating cytokines [23]. Some TCs differentiate into

effector TCs and up-regulate the Sphingosine-1-phosphate receptor-1 (S1P<sub>1</sub>r) 43  
facilitating egress [24]. An increasing proportion of TCs differentiate into memory 44  
cells [25,26]. Proliferation of CD8<sup>+</sup> TCs can continue independent of further stimuli, 45  
possibly with an impaired memory cell response [27,28]. Contrastingly, CD4<sup>+</sup> TCs are 46  
more dependent on sustained inflammatory stimulation for continued differentiation [29]. 47  
As infectious signals subside, remaining effector TCs undergo apoptosis while memory 48  
cells go into circulation [30]. 49

Throughout these processes, the egress of TCs from the LNs is modulated by 50  
Sphingosine-1-Phosphate (S1P) and chemokine signalling axes. After entering the LNs, 51  
TCs initially express S1P<sub>1</sub>r at very low levels but begin re-expressing S1P<sub>1</sub>r after 2 hours 52  
[31,32]. TCs exit the LNs by probing and subsequently entering cortical sinuses in the 53  
paracortex or the interface with the medulla, aided by chemotaxis as both destinations 54  
contain higher S1P concentrations (Fig 1A) [33,34]. During inflammation, TC S1P<sub>1</sub>r 55  
expression is reciprocally regulated by CD69, an early TC activation marker that can be 56  
up-regulated in TCs by the presence of inflammatory mediators, contributing to the 57  
initial decrease in TC egress and later retention of activated TCs [35]. 58

**Fig 1. The structure of the LN and the ABM geometry.** (A) LN structure 9  
displaying the pathway of arriving lymphatic fluid. (B) The model describes a spherical 10  
paracortex, TCs enter in the center and exit near the interface with the medulla and 11  
SCS. The paracortex radius expands as a function of TCs present. (C) TCs move to 12  
adjacent grid-compartments, interact with neighbouring agents and are influenced by 13  
the grid-compartment properties, which are updated each time-step. Micro-scale signals 14  
can influence recruitment, exit and DCs interaction. (D) Macro-scale changes in 15  
paracortex size influence TC recruitment and exit rate. (E) Micro-scale and macro-scale 16  
changes influence each other and affect the number of TCs present 17

The exploration of potential roles for swelling of LNs in adaptive immunity is limited 59  
by the range of possible experiments in which parts of the process could be modulated, 60  
and the ability to track relevant outcomes in real time. Mathematical models can help 61  
fill these knowledge gaps, and suggest new experiments that target specific mechanisms 62  
and measure outcomes at specific time points. Modelling cell populations with partial 63  
differential equations is computationally expensive and typically involves assuming 64  
uniform cell responses to stimuli. Within Agent Based Models (ABMs), cells are 65  
described as discreet, and by modelling the interaction of thousands of agents behaving 66  
individually, it is possible to capture emergent behaviour. The TC immune response in 67

an expanding paracortex has previously been described with an ABM, however the  
assumption of a constant TC occupancy of the total paracortical volume potentially  
neglected the effects of crowding on cell migration [36–38]. ABMs of fixed-volume LNs  
have provided insight relevant to vaccine design, for example to investigate the effect of  
antigenic peptide separation from MHC molecules on TC activation, influential aspects  
of TC-DC interaction, and effector TC or memory cell production [39–43]. Simulations  
integrating a fixed-volume hybrid lattice-based model and a continuous model allowed  
incorporation of chemokine diffusion with TC, B cell and DC interactions in the LNs.  
This showed that both early antigen removal and regulation of TC exit affected the  
balanced system dynamics, indicating that macroscale swelling is likely to significantly  
affect micro-scale TC activity [44]. Indeed, models of lymph flow through the LNs  
suggest that altered oncotic and medulla pressure alone would dramatically alter cell,  
cytokine and chemokine distribution [45, 46].

In summary, the adaptive immune response involves careful trafficking and  
coordination of immune cell movements in the LNs, suggesting that swelling of LNs is  
likely to significantly impact the adaptive response at the micro-scale. To investigate  
this hypothesis, a computational ABM was developed that incorporates TC and DC  
dynamics, swelling of LNs and changes in TC recruitment and egress. The model was  
first validated against the available experimental data. The results suggest an important  
role for swelling of LNs in TC population dynamics.

## Materials and methods

### ABM Geometry

The paracortex is modelled as a sphere with initial radius  $R_0=400\mu\text{m}$ , derived from  
confocal images [2, 47]. The modelling domain is divided into cuboid grid compartments,  
edge length of  $6\mu\text{m}$  (Fig 1C). To reduce computational expense, geometric symmetry is  
assumed so that only one-half of the total spherical geometry is modelled. Variables for  
each compartment determining features such as 'exit' or 'boundary' are stored in a  
parallel 'ValueLayer'. Paracortical volume is calculated as a function of TCs present  
and paracortical swelling, and contraction is achieved by changing the type of region

that each grid compartment represents, while maintaining entry and exit areas defined  
as a percentage of the outer radius (Fig 2A,G).

**Fig 2. Grouping the parameters of the model.** Model geometry, TC  
initialisation, DC initialisation and T cell movement are not varied in the sensitivity  
analysis. TC movement parameters were varied in preliminary trials before being fixed.  
Reference sources for all parameters are available in S2 File.

## TC recruitment

Under baseline conditions, TC recruitment rate was specified as 2000 TCs/hour, naive  
TC transit time ( $T_{res}$ ) as 6-24 hours and the TC-to-compartment ratio was assumed  
constant (see S1.1). In accordance with images depicting HEV location, 90% of TCs  
enter at 'HEV entry' compartments designated as the inner half of the paracortical  
radius [48]. These grids also correspond to the blood vessel volume ( $V_B$ ), which changes  
in proportion to overall paracortical volume change [4,45]. Remaining TCs enter via the  
SCS interface at compartments adjacent to the afferent half of the external surface. To  
allow blood vessel volume ( $V_B$ ) changes to contribute to TC recruitment rate, TC influx  
is made proportional to normalised blood vessel volume  $\bar{V}_B$  (normalised with respect to  
the pre-stimulus value). Acute recruitment changes due to inflammation-induced  
signalling cascades at the HEVs are represented by incorporating an inflammatory  
index, ( $I_f$ ), triggered by antigenic presence (sum of MHC thresholds to trigger (T1) and  
cap (T2) recruitment)(2). TC influx is therefore :

$$T_{in}(t) = \frac{N_T}{T_{Res}} I_F(t) \bar{V}_B(t) \quad (1)$$

Where  $N_T$  is the initial number of TCs present. Threshold values T1 and T2 were  
estimated from *in-vivo* observations of stimuli application and recruitment response.

$$I_f(t) = \begin{cases} 1 & \sum_{n=1}^{N_{DC}} MHC_n(t) \leq T1 \\ 1 + R_F \sum_{n=1}^{N_{DC}} MHC_n(t) & T1 \leq \sum_{n=1}^{N_{DC}} MHC_n(t) \leq T2 \\ 1 + R_F T2 & \sum_{n=1}^{N_{DC}} MHC_n(t) \geq T2 \end{cases} \quad (2)$$

## TC egress and S1P<sub>1</sub>r expression

The relative expression of S1P<sub>1</sub>r (SP) is varied from 0.01 (egress inhibition) to 1.4 (egress facilitation). Following TC entry into LNs, S1P<sub>1</sub>r is down-regulated for 45-180 minutes, with SP=0.1 (Fig 2F) [32]. TCs undergo inflammation-induced S1P<sub>1</sub>r inflammation, to reflect the 3-30 fold decrease in TC egress in the initial 24 hours of an immune response [49]. This is implemented when the antigenic presence (represented by total MHCII present) first exceeds the equivalent of 240 agDCs. Activation-induced TC S1P<sub>1</sub>r down-regulation and subsequent re-expression as TCs undergo differentiation is applied by decreasing SP when TCs first become activated, increasing SP as TCs differentiate into effector TCs, and further increasing SP when effector TCs undergo  $\geq 7$  divisions [31, 50, 51].

## TC and DC motility and interaction

DCs are modelled as 6 $\mu$ m diameter spheres, but interact with up to a user-defined maximum number of TCs at one time ( $B_{max}$ ), within a two grid radius, to reflect long dendrites (Fig 2B). Interaction times are drawn from a Weibull and two uniform probability distributions, with brief 3 minute interactions for non-cognate TCs ( $T_{NC}$ ). Cognate TCs initially undergo short ( $T_{short}$ ) interactions, of 10-15 minutes, then proceed to longer interactions ( $T_{long}$ ) of 50-70 minutes (Fig 2E). Each agDC presents a decaying MHC I and MHC II signal (Eq.S1) with half lives  $MHCI_{\frac{1}{2}}$  and  $MHCII_{\frac{1}{2}}$ , obtained from *in-vitro* labelling of MHC molecules presented on DCs [52–55].

TCs (70% Helper TCs (CD4<sup>+</sup>) and 30% cytotoxic (CD8<sup>+</sup> TCs) are modelled as spheres of radius 3.2 $\mu$ m that initially occupy 60% of the total paracortex volume [56].

Each 20 second time-step TCs are permitted to move, with probability  $\beta$ , one grid length to a random available neighbouring grid compartment, where availability is governed by crowding parameter  $\gamma$ . The proportion of cognate TCs recruited each time-step ( $F_{cog}$ ) was obtained from reported *in-vivo* frequency of antigen-specific TCs [21].

Cognate TCs gain 'stimulation' ( $S$ ) during interactions with agDCs at rate  $K_s$ , proportional to MHC presented, while losing stimulation at rate  $\lambda_S$  (Fig 2C), similarly to the methods of [37,41,57]. Probability of subsequent activation and differentiation depends on accumulated stimulation. More simulation was required to activate CD8<sup>+</sup> TCs with the same probability as CD4<sup>+</sup> TCs. However, if the DC is 'licenced', which occurs post-interaction with an activated CD4<sup>+</sup> TC, CD8<sup>+</sup> TC and CD4<sup>+</sup> TC stimulation requirements are equal. This is to reflect facilitated CD8<sup>+</sup> activation as a result of activated CD4<sup>+</sup>-induced production of cytokines [58]. The fraction of effector TCs that differentiate into memory TCs increases from 0.01 to 0.04 as TC progress from 'early effectors' (< 6 proliferations) to 'late effectors' [59]. See S1 File for full rules and S2 File for parameter references.

## Simulations and analysis

The ABM was built in RepastSimphony (<http://repast.sourceforge.net>) as a class based model (S1 Fig) written in java with repeated rules each timestep (Fig 3. Further UML-based descriptions are available within S3 File. The Imperial College High Performance Computing cluster was used to carry out batch simulations and data analysis was carried out in Matlab. Complete code is available at [github.com/johnsara04/paracortex\\_model\\_johnson19](https://github.com/johnsara04/paracortex_model_johnson19). Raw data is available at [xxx].



**Fig 3. Setup processes in the model.** (A) Individual agents, (TCs and DCs) store variables regarding their history and present state while 'projections' between agents allow information transfer. The model is equilibrated then volume change is introduced and initial volumes re-initialised. There is discernment between TCs that enter and TCs present from time 0. Each time step represents 20s of simulated time and model outputs are recorded every, 1, 15 or 180 time-steps dependent on user specification. (B) The repeated sequence of sub-methods that make up the 'main' process. Each method () contains further rules and actions, with descriptions available within the supplementary S3 File.

Baseline simulations with limited paracortical swelling ( $V_{Max}$ ) were performed to ensure estimated parameters (listed in S2 File) produced realistic TC response dynamics. TC response was then assessed while varying maximal fold-increase in swelling volume ( $V_{Max}$ ) from 1 to 2.8, varying the required number of TCs present to reach half  $V_{Max}$ , ( $T_{mid}$ ) between  $8e4$  and  $13e4$  and modulating S1P<sub>1</sub>r expression on newly differentiated TCs (effector TCs having undergone 4-6 proliferations). Effector TC response was assessed when TCs were permitted to re-enter HEVs and also when increasing exit probability if two TCs occupied an exit compartment. Analysis of correlation was assessed by calculating Pearson's coefficient, ANOVA was applied to detect variance, and linear regression was used to confirm linear relationships. A significance threshold of  $p < 0.05$  was used throughout.

A global sensitivity analysis was also carried out using 300 parameter combinations, repeating simulations with each combination 3 times. Combinations were selected using Latin Hypercube sampling, to reduce sample size while ensuring inclusion of samples near the minimum and maximum parameter ranges. Partial-rank correlation coefficients were calculated between each parameter and output of interest (activated TCs, effector TCs, memory TCs, effector TCs exited and memory TCs exited) from day 3 to 13, assuming monotonic relationships [60].

## Validation

The relationship between initial proportion of cognate TCs and subsequent effector TC production has been studied *in-vitro* by applying antigen to pools of TCs with known starting cognate frequencies [59,61]. To compare the model behaviour, the initial proportion of cognate TCs was varied *in-silico* between  $1.0 \times 10^{-5}$  and  $1.4 \times 10^{-4}$  and the resulting CD4<sup>+</sup> and CD8<sup>+</sup> effector TC response compared to the *in-vitro* results. The

effect of varying stimuli strength on CD8<sup>+</sup> effector TC response in LNs has been 184  
investigated *in-vivo* and *in-vitro* by varying injecting mice with varying bacterial 185  
antigen dose or agDCs and applying antigen-pulsed DCs to TC culture [62,63]. These 186  
experiments were replicated *in-silico* by varying agDCs as a fraction of total TCs ( $\phi_{DC}$ ) 187  
incrementally from 0.04 to 0.0015 (2200 to 77 agDCs), and comparing CD8<sup>+</sup> TC 188  
response. The effect of curtailing the duration of antigenic stimuli has been carried out 189  
in rat LNs by injecting diphtheria toxin (DT)-sensitive agDCs into the LNs then 190  
eliminating the DCs with DT injection, prior to natural DC apoptosis [64]. Early DC 191  
apoptosis was simulated *in-silico* and the effect on the total number of CD8<sup>+</sup> effector 192  
TCs compared to the published *in-vivo* observations. Finally, down-regulation of S1P<sub>1</sub>r 193  
on activated TCs was abolished *in-silico* and total activated and cognate CD4<sup>+</sup> and 194  
CD8<sup>+</sup> TCs present compared to similar experiments [32,65]. 195

## Results 196

### The model produces realistic baseline TC motility and response 197 to agDCs 198

The average TC velocity (n=200) was 13.1 $\mu$ m/min and reached 24 $\mu$ m/min (Fig 4D), 199  
in-line with murine *in-vivo* measurements [48,66–69]. TC displacement scaled well with 200  
the square root of time, (Fig 4E,F) indicating random walk behaviour and the motility 201  
coefficient (CM) was 63.2 $\mu$ m/min, which is within the range of 50-100 $\mu$ m/min observed 202  
in mice [70]. The mean TC paracortex transit time was 13.1 hours (n=16,000), ranging 203  
from 20 minutes to >60 hours (Fig 4C), in-line with observations that 74% of 204  
CD4<sup>+</sup>TCs and 64% of CD8<sup>+</sup> TCs transit the murine LNs within a day [71]. 205

**Fig 4. Baseline TC motility.** (A) TC tracking through the paracortex with individual tracks displayed. TCs entered centrally, representing entry from HEVs, and at the top of the paracortex, representing entry in afferent lymph (yellow arrow). TCs exited at the periphery (green arrows). (B) Tracks of TCs (each colour represents one TC path) transposed to the same origin point display the random walk behaviour outwards from the origin. (C) Most TCs completed transit in <24hrs. (D) Mean velocity of TCs. (E) Mean and SEM (n=100) of TC displacement from entry point. (F) Mean (+/-SEM) of TC displacement showed a linear relationship to the square root of time.

TC responses to AgDC stimuli corresponded well to experimental data from 206  
cell-culture models and *in-vivo* trials in mice, sheep and rats, displaying the expected 207  
phases of TC trafficking and response (S2 Fig). TC numbers began to increase around 6 208  
hours after initial agDCs entry, and by day 11 had returned to within 15% of 209  
pre-stimulus values (Fig 5A), in-line with temporal responses observed *in-vivo* [9, 14, 72]. 210  
The appearance of activated, effector, and memory TCs began at 16-24 hours, day 3.5 211  
and day 5 post-agDC entry, respectively, in agreement with cell-culture models and 212  
*in-vivo* observations [73, 74]. Effector CD4<sup>+</sup> TCs appeared 1-1.5 hours before CD8<sup>+</sup> 213  
effector TCs (Fig 5A,B). As observed in studies using cell culture, the peak population 214  
of cognate CD8<sup>+</sup> TCs was an order of magnitude higher than that of CD4<sup>+</sup> TCs 215  
(Fig 5C) [75]. The contraction phase began at day 7 and continued through day 11. The 216  
increase in TC egress rate peaked a day later than the increase in TC entry rate 217  
(Fig 5D), corresponding well with *in-vivo* observations of delayed increase in TC egress 218  
and TC recruitment dynamics [10, 76]. 219

**Fig 5. TCs response in the paracortex following entry of agDCs.** Average 220  
result with SEM of 12 simulations. AgDCs are depicted as dot-dashed line in B. The 221  
total number of TCs (black line in A) peaked in the paracortex at 3.5 days, and was 222  
comprised mainly of non-cognate naïve TCs, as the number of effector TCs (blue line A) 223  
peaked at day 6. This contributes to the second peak in the total TC number. The 224  
number of activated TCs (red line in B) began 12 hours after the first agDCs entered. 225  
Memory TCs (black line in B) began to appear at 5 days and 25% of the peak number of 226  
memory TCs remained at the end of the simulation. Cognate CD4<sup>+</sup> TCs (Green line in 227  
C) began to proliferate extensively at day 2.2, compared to cognate CD8<sup>+</sup> TCs (purple 228  
line C) that began to proliferate at day 4 and reached numbers 10x more than cognate 229  
CD4<sup>+</sup> TCs. D. TC entry rate increased 2x due to detection of antigenic stimulus whilst 230  
TC egress rate declined between day 1 and 2, then increased 3x by day 4.

When the proportion of initially cognate TCs,  $F_{cog}$ , was increased from  $7e-5$  to 220  
 $13e-5$ , total cognate CD8<sup>+</sup> TC number increased by 56% (S3 FigF), comparing well to 221  
the 62% increase observed *in-vivo* [59]. Simulations across a wider range of  $F_{cog}$  values 222  
confirmed a monotonic trend (S3 FigC). Simulations designed to replicate *in-vivo* 223  
experiments [61] showed CD4<sup>+</sup> numbers generally increasing with  $F_{cog}$ , but a slight 224  
decrease at  $F_{cog}=1.6e-6$  (Figure S3B). Further simulations at higher values of  $F_{cog}$  225  
predicted a trend of increasing cognate CD4<sup>+</sup> TC numbers, consistent with the *in-vivo* 226  
observations (S3 FigD). 227

Increasing the percentage of agDCs,  $\Phi DC$ , *in-silico* resulted in a proportional 228

increase in total cognate effector TCs and initially proportional increase in cognate CD8<sup>+</sup> TCs that proceeded towards a plateau (Fig 6D-F). Cognate CD8<sup>+</sup> TCs showed a significant response in some simulations, or little response in others (Fig 6D). These results are similar to those following injection of increasing doses of antigenic agent to mice, or agDCs to CD8<sup>+</sup> TC culture, showing an initial proportional increase in CD8<sup>+</sup> proliferation that gradually reached a plateau (Fig 6A,C) [62]. Total TC response and number of cells of the LNs has also been observed to increase in a linear fashion (Fig 6C) [63].

**Fig 6. TC responses *in-silico* and *in-vivo* when the DC stimuli (no. of DCs applied as a fraction of initial TCs present,  $\phi$ DC) is varied.** The estimated percentage of CD8<sup>+</sup> TCs that underwent a proliferative response (A) in the LNs of chimeric mice 7 days post-injection with antigen LM-GP33 and (B) in cell culture post-application of DCs. (C) Similarly, total cell counts of the draining LN, after doses of mature DCs were injected into mice, show an increase in TC numbers that plateaus with increasing dose. (D) Analysis of *in-silico* CD8<sup>+</sup> TC response at low doses showed a significant response (1e4 total cognate CD8<sup>+</sup>TCs) or no proliferative response at all (<10 cognate CD8<sup>+</sup>TCs). (E) *In-silico* simulations increasing the proportion of DCs resulted in increasing numbers of cognate CD8<sup>+</sup> TCs that plateaued as the DC dose increased, a pattern reflected in the overall total number of effector TCs (F).

To replicate murine experiments disrupting agDC presence, simulations were performed eliminating agDCs 12 hours post-entry (instead of permitting a 60 hour lifespan). This resulted in a 91% reduction in peak cognate CD8<sup>+</sup> TC peak (S4 FigC). This compares well with results observed when transgenic DT-sensitive agDCs were injected into murine LNs, then eliminated by injecting DT 1 or 12 hours later, which resulted in a 93% and 85% decrease in CD8<sup>+</sup> TC magnitude respectively when compared to no-elimination (S4 FigA) [64].

Abrogating S1P<sub>1</sub>r down-regulation after antigenic stimulus detection *in-silico*, reduced the number of activated TCs in the paracortex by 60%, 72% and 81% at  $V_{max}=1.2, 2.0$  and  $2.5$  (Figure S5D). This was a smaller reduction than observed during *in-vivo* experiments when activated TCs maintaining S1P<sub>1</sub>r expression were transferred to LNs, resulting in 90% less activated TC retention in the LNs 15 hours later compared to control mice (S5 FigA) [32]. The *in-silico* reduction was, however, greater than the 40% reduction in activated TCs found with constitutive TC expression of S1P<sub>1</sub>r *in-vivo* post-immunisation (S5 FigB) [65]. The *in-silico* total number of CD4<sup>+</sup> and CD8<sup>+</sup> effector TCs reached 20% and 6% respectively of the control response when S1P<sub>1</sub>r was

abrogated (S5 FigE,F). This is similar to the 27% and 5% of control response recorded with constitutive inhibition of S1P<sub>1</sub>r expression *in-vivo* (S5 FigC) [65].

## Paracortical swelling consistently aids TC activation but not effector TC production

When maximal swelling ( $V_{max}$ ) was varied from 1 to 2.8, activated TC number positively correlated with  $V_{max}$  ( $p < 10^{-5}$ ) doubling in number (Fig 7A). However, total number of effector TCs negatively correlated with  $V_{max}$  ( $p < 10^{-4}$ ) and decreased by 15% (Fig 7B). Neither the number of effector TCs that exited by day 10, nor total number of cognate CD4<sup>+</sup> TC present varied significantly (S6 FigB,C). However, total cognate CD4<sup>+</sup> TCs that left the paracortex by day 10 increased by 30% and positively correlated with  $V_{max}$  ( $p = 0.001$ ) (Fig 7C). CD8<sup>+</sup> TC numbers showed the opposite pattern. There was no change in the number of exited cognate CD8<sup>+</sup> TCs (S6 Fig.D) but the total number of cognate CD8<sup>+</sup> TCs present decreased by 25% and negatively correlated with  $V_{max}$  ( $p < 10^{-4}$ ) (Fig 7D). The maximum rate of TC recruitment positively correlated with  $V_{max}$  and TC egress rate increased with  $V_{max}$  from day 6-10 (Fig 7E,F).

**Fig 7. The variation in TC subsets as  $V_{max}$  was varied from 1 to 2.8 with  $T_{mid} = 10^5$ .** (A) The total activated no. of TCs in the paracortex incrementally increased with  $V_{max}$  and doubled in number between  $V_{max}=1$  and 2.8. (B) The total no. of effector TCs decreased 0.3x with increasing  $V_{max}$ . (C) The total no. of cognate CD4<sup>+</sup> TCs that exited positively correlated with  $V_{max}$  ( $r=0.87$ ,  $p=0.001$ ) and increased 1.3x. (D) The total cognate CD8<sup>+</sup>TCs negatively correlated with  $V_{max}$  ( $r=-0.92$ ,  $p=1.28e-4$ ). (E,F) Peak entry and peak exit rate increased proportionally to  $V_{Max}$ . All results are the mean of  $n_i=7$  simulations with SEM displayed. (E) Total TCs in the paracortex.

Analysis of the number of TCs a DC contacted from 30 hours post-infection onwards showed that contact became more significant during simulations permitting a larger swelling, but increased contact did not necessarily result in more activated or effector TCs. At  $V_{max}=2.0$ , a positive correlation was observed between effector TCs produced and contacts whereas at  $V_{max}=1.2$ , there was no significant correlation (Fig 8A,B). However, as swelling increased, the mean number of cognate TCs a DC contacted decreased ( $p < 10^{-4}$ ) (Fig 8C). The number of non-cognate TCs a DC interacted with positively correlated with  $V_{max}$  ( $p < 10^{-4}$ ) (S6 FigA). Activated TC numbers negatively

correlated with cognate TC contacts as  $V_{max}$  increased ( $p=0.002$ ) (Fig 8D). Up to  $V_{max}=1.8$ , the number of effector TCs present increased with contacts (Fig 8E) but contacts had no effect on the number of exited effector TCs (S6 FigI). The number of cognate TC to DC contacts negatively correlated with cognate  $CD4^+$  TCs exited ( $p < 0.05$ ), positively correlated with total  $CD8^+$  TCs ( $p < 10^{-5}$ ), and showed no correlation with cognate  $CD4^+$  TCs present or  $CD8^+$  TCs exited (Fig 8F,G & S6 FigG,J).

**Fig 8. Changes in the number TCs a DC contacts.** (A) At  $V_{max} = 1.2$ , analysis of individual simulations showed a slight linear but non-significant correlation between total effector TCs produced and cognate TCs contacted ( $r = 0.52$ ,  $p = 0.12$ ). (B) At  $V_{max} = 2.0$  there was a significant positive linear correlation between cognate TCs contacted by DCs and total effector TCs ( $p = 0.0066$ ). (C) When varying  $V_{max}$ , the mean number of cognate TCs contacted by DCs ( $n=10$ ) negatively correlated with  $V_{max}$   $r = -0.92$ ,  $p = 2.02e-04$ , with a polynomial fit with 2 degrees ( $R^2 = 0.86$ ) displayed. (D) The mean no. of total activated TCs negatively correlated with TCs contacted, which occurred as  $V_{max}$  became larger (2 degree exponential fit,  $r = -0.85$ ,  $p = 0.002$ ). (E) The mean no. of total effector TCs, positively correlated with TCs contacted,  $r = 0.93$   $p = 7.6e-05$  (linear fit  $p = 4.21e-05$ ). (F) The mean no. of total  $CD4^+$  TCs that exited the paracortex negatively correlated with mean TCs contacted by DCs  $r = 0.75$ ,  $p = 0.013$ , (linear fit  $p = 0.013$ ). (G) The mean no. of total  $CD8^+$  TCs in the paracortex positively correlated with TCs contacted,  $r = 0.93$ ,  $p = 7.63e-05$ , which increased as  $V_{max}$  became smaller (linear fit  $p = 7.63e-05$ ).

## Varying the ease of swelling influences resulting TC populations.

In some cases, varying the required number of T cells present to reach half the maximal swelling, ( $T_{mid}$ ), counteracted the effect of varying maximal swelling of LNs on effector TC production. When simulations were carried out with a lower or higher  $T_{mid}$  of  $8e4$  or  $12e4$ , and a small ( $V_{max} = 1.2$ ) or large ( $V_{max} = 2.5$ ) maximal swelling, a similar number of effector TCs were produced with a low  $T_{mid}$  and low  $V_{max}$  compared to with a high  $T_{mid}$  and high  $V_{max}$  (Fig 9C). The difference in effector TC response appeared to be due to cognate  $CD8^+$  TC behaviour, as there was no significant difference in cognate  $CD4^+$  TCs numbers with  $T_{mid} = 8e4$  or  $12e4$  at either  $V_{max} = 1.2$  or  $2.5$  (Fig 9D,E). With a lower  $T_{mid}$  of  $8e4$ , paracortex swelling began one day earlier than with  $T_{mid} = 12e4$  (Fig 9A). Most TCs were activated with a low  $T_{mid}$  and high  $V_{max}$ , however at least 40% more activated TCs were recorded when  $V_{max}$  was high compared to when  $V_{max}$  was low regardless of  $T_{mid}$  (Fig 9B). Further simulations varying  $T_{mid}$

with a wider maximal swelling range confirmed that the number of activated TCs increased with expansion, but at every value of  $V_{max}$ , correlated negatively with  $T_{mid}$  (Fig 10A), which suggests that earlier swelling, whether induced by larger  $T_{mid}$  or  $V_{max}$ , aids initial TC activation.

**Fig 9. Increasing  $T_{mid}$  counteracts the loss in effector TCs with  $V_{max}$ .** (A) The paracortex volume change using different parameter combinations of  $V_{max}$  and  $T_{mid}$ . (B) Activated TCs increased at larger values of  $V_{max}$ . At  $V_{max}=1.2$  there was no significant difference when  $T_{mid} = 8^5$  or  $10^5$  (t-test  $p=0.12$ ), but a significant difference at  $V_{max}=2.5$  ( $p=0.002$ ). (C) Increasing  $T_{mid}$  at  $V_{max}=2.5$  meant effector TC numbers became the same or more than at  $V_{max}=1.2$ . (D) Total  $CD4^+$  TCs increased with  $V_{max}$  only, and showed no significant difference with  $T_{mid}=8e4$  or  $12e4$ . (E) Total  $CD8^+$  TCs exited reflected the pattern of overall effector TCs.

**Fig 10. Increasing  $T_{mid}$  decreases the number of activated TCs as swelling increases (A) but results in more total effectors TCs (D) and effector  $CD8^+$  TCs (E) that leave the paracortex. (B,C).** The number of DC and cognate TCs shows no correlation at small swelling values and positive correlation at larger values when  $T_{mid}$  is increased. (F) Effector  $CD4^+$  TCs that exit show a negative correlation with  $T_{mid}$  at smaller swelling values ( $V_{max}=1.2$  and  $1.5$ ) only. G.Repeating the initial simulations but increasing  $T_{mid}$  from  $10e5$  to  $12e5$  results in the disappearance of the negative effect of swelling on effector TCs exited and (H) Cognate  $CD8^+$  TCs exited. (I) Cognate  $CD4^+$  TCs continue to increase with swelling. No clear correlation is seen with  $V_{max}$  and DC contacts with cognate TCs (J) or activated (K) and effector (L) TCs produced.

Increasing the range of maximal swelling values also showed that the larger  $V_{max}$ , the greater the influence of  $T_{mid}$  on the number of effector TCs produced. When maximal swelling was smaller ( $V_{max} < 1.5$ ), varying  $T_{mid}$  did not significantly affect the total number of effector TCs. However, with larger maximal swelling, increasing  $T_{mid}$  from  $10^4$  to  $13^4$ , thus delaying swelling, resulted in a 20-40% increase in effector TCs (Fig 10D). Production of cognate  $CD4^+$  TCs may be aided by a lower  $T_{mid}$  and earlier expansion, as at a lower  $V_{max}$ , increasing  $T_{mid}$  showed a trend towards less cognate  $CD4^+$  TCs leaving the paracortex, although this did not reach significance (at  $V_{max}=1$ ,  $p=0.08$  and at  $V_{max}=1.5$ ,  $p=0.051$ ) (Fig 10F). However, at larger swelling no benefit is gained by varying  $T_{mid}$  as total cognate  $CD4^+$  TC numbers increased with  $V_{max}$  regardless of  $T_{mid}$  value. Therefore, the increased effector TC number with high  $T_{mid}$  and  $V_{max}$  is mainly due to  $CD8^+$  TCs, with the number of cognate  $CD8^+$  TCs that exited paracortex correlating positively with  $T_{mid}$  ( $p=<0.05$ ) at a high  $V_{max}$  (Fig 10E).

TC and DC contacts were consistent with the earlier results (Fig 8C) that at a



larger paracortical expansion, with each value of  $T_{mid}$ , the overall number of cognate TCs contacted was less than when the same value of  $T_{mid}$  was applied with a smaller paracortical expansion (Fig 10B,C). However, at the larger maximal swelling value of 2.5, as  $T_{mid}$  increased, the DCs contacted more cognate TCs. At  $V_{max}=2$ , no correlation between contacts and overall cognate TC number occurred (S7 FigA), but a positive correlation was observed between contacts and effector TCs produced ( $p<10^{-3}$ ),  $CD8^+$  TCs produced ( $p=0.03$ ) and  $CD8^+$  exited ( $p=0.027$ ) (Fig 10D,E). At lower values of  $V_{max}$ , no similar correlations were observed.

When maximal swelling was varied in 0.2 increments with a higher  $T_{mid}$  ( $12e5$ ), the number of cognate  $CD8^+$  TCs no longer decreased with  $V_{max}$ , and an intermediate swelling of 1.8-fold became the optimum  $V_{max}$  to produce effector TCs. At  $V_{max}=1.8$ , 7% more total effector TCs and cognate  $CD8^+$  TCs exited than at any other value of  $V_{max}$  (Fig 10G). TC activation was also 40% higher than the value at  $V_{max}=1.0$ , but less than the 120% increase at  $V_{max}=2.6$  (S7 FigB). In contrast, no correlation was observed between the number of TCs contacted and number of activated TCs produced at different values of  $V_{max}$  or the number of cognate TCs contacted and the number of effector TCs exited (Fig 10K,L).

## Degree of swelling influences sensitivity of the model to parameter variations.

A parameter sensitivity study revealed that the identified correlations between parameters and measured output (measures of TC activation and differentiation), often reversed or no-longer showed correlation during simulated weeks 1 compared to week 2, and between simulations with fixed volume or expanding LNs. This provides additional evidence that swelling dynamics influence effector TC response. In a fixed paracortical volume a strong positive partial-rank-correlation coefficient was presented by several parameters that would logically drive TC activation and proliferation, such as starting proportion of cognate TCs ( $F_{cog}$ ) ( $p<10^{-6}$ ) or fraction of DCs ( $\Phi DC$ ) ( $p<10^{-6}$ ), with TC activation and effector TC production (Table 1,2 and S1 Table). However, when paracortical expansion was allowed, a positive correlation was observed in the first week only. The effect of  $V_{max}$  also reversed between weeks one and two, positively correlating



to activated TCs in the paracortex up to day 4 and 6 ( $p < 0.05$ ) but negatively correlating from day 6 ( $p < 10^{-6}$ ) with activated TCs, effector TCs present and effector TCs exited (Table 1 and 2, S1 Table-S3 Table). Another example of a parameter that changed TC dynamics is the duration of DC entry ( $DC_{in}$ ). Reducing  $DC_{in}$  while maintaining the number of entering DCs activates TCs earlier, whereas increasing it facilitates sustained but slower TC activation (Table 1). An additional sensitivity analysis increasing the upper-range of S1P<sub>1</sub>r down-regulation on activated TCs ( $SP_{act}$ ), from 0.4 to 0.8, eliminated the correlation between  $V_{max}$  and effector TCs (Table 3). These results suggest that  $V_{max}$  can mask the effects of  $SP_{act}$  or conversely, maintaining a low  $SP_{act}$  value diminishes the effects of  $V_{max}$ . Overall, the most influential parameters were those related to S1P<sub>1</sub>r regulation of activated TCs, early effector TCs and memory TCs ( $SP_{act}$ ,  $SP_{early}$ ,  $SP_{mem}$ ), signal shape ( $\Phi_{DC}$ ,  $DC_{in}$ ), frequency of TC cognition ( $F_{cog}$ ), TC recruitment ( $R_f$ ,  $RT_2$ ) and paracortical expansion ( $V_{max}$  and  $T_{mid}$ ). Additional results are shown in S1 Table, S2 Table and S3 Table.

**Table 1. Parameters that significantly affected number of activated TCs. Present in the paracortex from day 2 to 6 post-stimuli, in a fixed volume and an expanding paracortex.**

| Parameter   | With Swelling |       |       |       |       | Without Swelling |       |       |       |       |
|-------------|---------------|-------|-------|-------|-------|------------------|-------|-------|-------|-------|
|             | Day2          | Day 3 | Day 4 | Day 5 | Day 6 | Day 2            | Day 3 | Day 4 | Day 5 | Day 6 |
| $Max_{NT}$  |               |       |       |       |       | +                |       |       |       |       |
| $F_{cog}$   | +++           | +++   | +++   | +++   | ++    | +++              | +++   | +++   | +++   | ++    |
| $DC_{\phi}$ | +++           | ++    | +++   |       |       | +++              | +++   |       | ++    | ++    |
| $T_{DCin}$  | ---           | ---   | ++    | +++   | +++   | ---              | --    | +     | +++   | +++   |
| $R_F$       |               | +++   | +++   |       | -     |                  | ++    | ++    |       |       |
| $V_{Max}$   | +             | +++   | +++   |       | -     | n/a              | n/a   | n/a   | n/a   | n/a   |

Key : +/- =  $0.05 > p > 0.001$     ++/- =  $0.001 > p > 10^{-6}$     +++/- =  $p < 10e^{-6}$

**Table 2. Parameters that significantly affected the number of effector TCs that exited the paracortex.** From day 3 to 12 post-stimuli. During week 2 post-stimuli, with the expanding model, the value of many parameters correlated negatively with the number of effector TCs that exit the LN, despite some of these parameters showing a consistent significant positive influence or a lack of influence when swelling is not permitted.

| Parameter               | Day 3 | Day 4 | Day 5 | Day 6 | Day 7 | Day 8 | Day 9 | Day 10 | Day 11 | Day 12 |
|-------------------------|-------|-------|-------|-------|-------|-------|-------|--------|--------|--------|
| <b>Without Swelling</b> |       |       |       |       |       |       |       |        |        |        |
| $TP_{4+}$               |       |       |       |       |       | +     | +     |        |        |        |
| $Max_{P8+}$             |       |       |       |       |       | +     | +     |        |        |        |
| $\gamma$                |       |       |       | -     | --    | --    | -     | -      | -      | -      |
| $F_{cog}$               | +++   | +++   | +++   | +++   | +++   | +++   | ++    | ++     | ++     | ++     |
| $\phi_{DC}$             |       | +     |       |       |       |       |       |        |        |        |
| $T_{DCin}$              |       | ---   | ---   | --    |       |       |       |        |        |        |
| $SP_{early}$            | +++   | +++   |       |       | +     | -     | --    | --     | --     | -      |
| $V_{Max}$               | n/a   | n/a   | n/a   | n/a   | n/a   | n/a   | n/a   | n/a    | n/a    | n/a    |
| $T_{Mid}$               | n/a   | n/a   | n/a   | n/a   | n/a   | n/a   | n/a   | n/a    | n/a    | n/a    |
| <b>With Swelling</b>    |       |       |       |       |       |       |       |        |        |        |
| $TP_{4+}$               |       |       |       |       |       |       |       |        |        |        |
| $Max_{P8+}$             |       |       |       |       |       |       | --    | --     | --     | -      |
| $\gamma$                |       |       | -     | -     | -     |       |       |        |        |        |
| $MHC_i$                 |       |       |       |       |       |       | --    | --     | -      | -      |
| $F_{cog}$               | +++   | +++   | +++   | +++   | +     |       |       |        |        |        |
| $DC_{\phi}$             | +     |       |       |       | --    | --    | --    | --     | --     | --     |
| $T_{DCin}$              | ---   | ---   | --    | -     |       |       |       |        |        |        |
| $SP_{early}$            | +++   |       |       |       |       |       |       |        |        |        |
| $SP_{mem}$              |       |       |       |       | -     |       |       |        |        |        |
| $R_F$                   |       |       |       |       | --    | --    | --    | --     | --     | --     |
| $V_{Max}$               | --    |       |       | --    | --    | --    | --    | --     |        |        |
| $T_{Mid}$               | --    |       |       |       |       |       |       |        |        |        |

Key : +/- =  $0.05 > p > 0.001$     ++/- =  $0.001 > p > 10^{-6}$     +++/- =  $p < 10e^{-6}$

**Table 3. Parameters that significantly affected the number of activated TCs, in an expanding paracortex from day 2 to 6 post-stimuli, after increasing the upper range of  $SP_{act}$ .**  $V_{max}$  was no longer significantly influential and instead  $SP_{act}$  became significantly influential. The parameters involved in TC recruitment  $R_F$  and  $RT_2$ , while still important, became less significantly influential.

| Parameter   | With Swelling |       |       |       |       |
|-------------|---------------|-------|-------|-------|-------|
|             | Day2          | Day 3 | Day 4 | Day 5 | Day 6 |
| $Max_{NT}$  |               |       |       |       |       |
| $F_{cog}$   | +++           | +++   | +++   | +++   | ++    |
| $DC_{\phi}$ | +++           |       | ++    | ++    |       |
| $T_{DCin}$  | ---           | --    | +     | +++   | +++   |
| $SP_{act}$  | --            |       |       |       |       |
| $SP_{mem}$  |               |       |       | -     |       |
| $RT_2$      |               | +     | +     |       |       |
| $R_F$       |               | ++    | +     | +     |       |
| $T_{mid}$   |               |       |       | -     |       |

Key : +/- =  $0.05 > p > 0.001$     ++/- =  $0.001 > p > 10^{-6}$     +++/- =  $p < 10e^{-6}$

## Changes in TC crowding impact effector TC response

The average TC to grid compartment ratio fluctuated within realistic levels in most simulations (0.6-1.3 in a volume equivalent to 1.75 TCs) (Fig 11A). However, when swelling was not permitted, non-physiological average levels above 1.75 and up to 2 occurred, due to rules permitting up to two cells per grid-compartment to prevent gridlock. TCs were modelled as spheres occupying 57% of a grid compartment, therefore a value of 2 exceeds the maximal average physiological ratio of 1.75. Simulations allowing TCs that shared a grid compartment additional opportunities to exit per step resulted in a significant difference in effector TC production at  $V_{max} = 1.0$  and  $V_{max} = 1.4$ , but no overall trend was observed (Fig 11B). However, when TCs were permitted to re-enter HEVs with a low probability ( $P_{e2}$ ), in a fixed-volume paracortex, the TC to grid ratio peaked at 1.6 instead of 2.0, and an average 10% decrease in total number of effector TCs was observed (Fig 11C,D). There remained a positive correlation with activated TCs and  $V_{max}$  ( $p < 10^{-5}$ ) (S8 Fig), and although the number of effector TCs still decreased, the correlation was less significant and weaker ( $R = -0.8$ ,  $p < 10^{-3}$ ) (Fig 11D).

**Fig 11. The effect of varying egress methods and LN maximal swelling.** (A) Under original modelling conditions, when swelling was permitted, the TC to grid compartment ratio did not exceed expected levels (1.75) (B) Comparison of effector TC response when increased egress with crowding was applied with no overall trend. (C) When TCs were permitted to return to HEVs with a small probability, less TCs were present in the LN at one time and the ratio of TCs to grid compartments remained within physiological levels ( $< 1.75$ ), even in a fixed volume LN. Slightly less effector TCs were produced at all values of  $V_{max}$  but this was only significant at  $V_{max} = 2.2$  and  $2.8$  \* = t-test  $p < 0.05$ .

## S1P<sub>1</sub>r-mediated temporary retention of early effector TCs increased TC response

Regardless of permitted maximal swelling, down-regulating S1P<sub>1</sub>r on early effector TC to less than 80% of naïve TC expression ( $SP_{Early} < 0.8$ ) produced a sustained increase in total TCs, despite the action only directly affecting the small subset of early effector TCs (Fig 12A). Reducing  $SP_{early}$  to 0.4 doubled the total number of effectors TCs, whilst  $SP_{early} = < 0.1$  increased the number of effector TCs that left the node by day 10 by 3-fold (Fig 12G). The number of effector TCs that exited continued to increase as

$SP_{early}$  was reduced to 0.05 with larger paracortical swelling only ( $V_{max} \geq 2$ ). The most effector TCs were produced at the smallest value of  $SP_{early}$  and largest maximal swelling (Fig 12G). When analysing the TC sub-populations, the number of both  $CD4^+$  and  $CD8^+$  effector TCs that exited the paracortex by day 10 increased 3-4 fold with  $SP_{early} < 0.1$  (Fig 12H,I). No further increase in  $CD8^+$ TCs exited was observed when  $SP_{early}$  was decreased to 0.05.

**Fig 12. Varying  $SP_{early}$  and thus retention of newly differentiated TCs.** (A) Reducing  $SP_{early}$  resulted in a higher total number of TCs in the paracortex. (B) At  $V_{max}=1.2$ , reducing  $SP_{early}$  to  $<0.1$ , despite retaining TCs, increased peak TC egress rate above the peak rate at baseline  $SP_{early}$ . (C,E) At  $V_{max}=1.2$  and 2.5, the TC-to-grid ratio was increased in the second half of the simulation when  $SP_{early}$  was reduced. (D) At  $V_{max}=2.5$ , reducing  $SP_{early}$  did not result in TC egress exceeding the peak rate at baseline  $SP_{early}$ . (E) At the larger  $V_{max}=2.5$ ,  $SP_{early} < 0.4$  maintained the peak TC-to-grid ratio for 4 days. (F) The number of activated TCs increased with  $V_{max}$  and was unaffected by  $SP_{early}$ . (G) Effector TCs that exited the paracortex were influenced more by  $SP_{early}$  than by  $V_{max}$ . The most effector TCs exited when  $SP_{early} \leq 0.1$  and when  $V_{max}=2$ . (H) The highest number of  $CD4^+$  TCs exited when  $SP_{early}$  was at the smallest value and  $V_{max}$  at the largest value. (I) The highest number of  $CD8^+$  TCs exited when  $SP_{early}$  was smallest (0.05) and maximal swelling intermediate ( $V_{max}=2.0$ ). (J) The mean number of cognate TCs contacted decreased with more paracortical swelling ( $>V_{max}$ ) but increased as  $SP_{early}$  decreased to 0.1.

To explore the accompanying effects of  $S1P_1$ -mediated increase in effector TC production, we analysed the accompanying alterations in TC and DC interaction, the proportion of TCs to paracortical volume and the TC exit rates. At all values of  $V_{max}$ , there was a 3-fold increase in the mean number of TCs contacted by DCs when  $SP_{early}$  was decreased from 0.8 to 0.1 (Fig 12J). However, when  $SP_{early} \geq 0.1$ , at larger values of  $V_{max} (\geq 2.0)$ , despite less DCs and cognate TCs contact, the same number or more effectors TCs exited than at smaller swellings. Other changes with a lowered  $SP_{early}$  of  $\leq 1$  included an increase in TC egress rate that was sustained for two days longer, and at  $V_{max} < 2.0$ , a doubling of TC egress rate from days 1-5, compared to simulations with  $V_{max} \geq 2$  (Fig 12B,D). By day 6 to 8, TC egress rate was similar between values of  $V_{max}$ . Despite increase in TC egress the TC to grid-compartment ratio also increased with  $SP_{early} \leq 0.1$  therefore TC egress did not exceed TC production (Fig 12.C,E). However, the TC to grid-compartment ratio was highest at lower values of  $V_{max}$  and  $SP_{early} < 0.1$ , but this parameter combination did not produce the most effector TCs, suggesting the balance between retention and increase is key for efficient TC production.

## Discussion

In this work we aimed to better understand the role of lymph node swelling and other adaptive immune processes in the formation of TC responses. Our study builds on methods used in previous work that confirmed the ability of ABMs to predict immune cell behaviours [37, 39–41, 43]. Model validation was accomplished by comparing predictions to a range of published experiments, and robustness was confirmed by multiple parameter variation analyses. By varying paracortical swelling and S1P<sub>1</sub>r expression, we showed that paracortical swelling aids TC activation, but early swelling can impair effector TC response. However, temporary retention of newly differentiated TCs influences the overall effector TC response more than swelling, providing a mechanism to overcome swelling-induced impairment.

A key finding from our study was the strong influence of S1P<sub>1</sub>r down-regulation on newly differentiated effector TCs on the number of effector TCs produced during immune response (Fig 12). Our study focused on the effect of temporary down-regulation of S1P<sub>1</sub>r on effector TCs that can amplify overall response, whereas previous studies have focused on the inhibitory effects of permanent S1P<sub>1</sub>r down-regulation. Induction and maintenance of S1P<sub>1</sub>r down-regulation on all TCs present is the mechanism of the recently developed multiple sclerosis drug Fingolipid, to prevent effector TCs migrating to the brain and participating in autoimmune response [77]. Inhibition of S1P<sub>1</sub>r expression on effector TCs only has also been carried out *in-vivo* [24]. However, temporary down-regulation on selectively newly differentiated TCs may prove technically difficult, suggesting identification of alternative means of retention is desirable.

Another key finding was that the initial 5 days of paracortical swelling facilitates the retention of activated TCs in the LNs (Fig 7A). Both TC recruitment and TC egress increase with swelling (Fig 7E,F) and therefore overall TC trafficking rate is increased, yet activated TCs are retained due to S1P<sub>1</sub>r down-regulation. When S1P<sub>1</sub>r-mediated retention is removed, depleted activation is observed *in-silico* and *in-vivo* (S5 Fig) and our simulations show that swelling no longer aids activation. Additionally, increased TC recruitment with HEV growth that accompanies swelling allows more cognate TCs to enter, an effect that is amplified when activated TCs proliferate. TC activation did not

appear to be constrained by DC and TC interaction during these simulations, as the  
mean number of cognate TCs a DC interacted with decreased with swelling, despite the  
increased space for TC migration and access (Fig 8C).

Thirdly, our results suggest that swelling of LNs too early can negatively impact TC  
response, by reducing the total number of effector TCs and the number of exiting  
effector CD8<sup>+</sup> TCs (Fig 10). Conversely, delaying swelling (increasing  $T_{mid}$ ) can result  
in just as many, if not more effector TC exiting the paracortex by day 10, as long as  
sufficient swelling is permitted (>1.5-fold). Delayed swelling allows for TC recruitment  
and retention to be a stronger influence than TC egress in the initial few days, possibly  
by reducing access to the number of exit points, as increased swelling increases TC  
egress rate. The multi-phase nature of these responses is supported by the results of the  
global sensitivity analysis, which showed that the influences of several parameters  
switched over time in the presence of node swelling (Table 1-3).

We also observed that early swelling hindered the CD8<sup>+</sup> effector TC response more  
than CD4<sup>+</sup> TCs, potentially due to the later and longer duration of simulated CD8<sup>+</sup>  
TC proliferation [78]. Earlier proliferation of CD4<sup>+</sup> TCs in the model may mean that a  
point of exponential proliferation is reached such that further proliferation is  
proportionally less affected by increases in TC egress that accompany paracortical  
swelling than CD8<sup>+</sup> TCs. Space to move and contact DCs may also limit CD8<sup>+</sup> TC  
proliferation. Analysis of DC and cognate TC contacts suggested that increased contact  
only became more influential at larger paracortical swelling only (Fig 8A,B). As CD8<sup>+</sup>  
TCs undergo more proliferation at the later stages in the response, with increased space  
and less remaining stimulus, each individual TC-DC interaction becomes more  
important.

The insight provided by our results imply that limiting effector TC production could  
be achieved by facilitating early swelling of LNs, or an immune dysfunction in  
chronically inflamed LNs, could be addressed by modulating swelling. Physiologically,  
factors that could be manipulated to alter the effective  $T_{mid}$  include stromal cell  
contractile behaviour and proliferation rate, the sensitivity of immune response to  
antigen signalling, and the sensitivity to accumulated fluid and TCs. Astarita et al.  
[2015] induced swelling by transferring 10<sup>6</sup> cognate TCs directly into murine LNs, whilst  
also effectively modulating  $T_{mid}$  by inducing FRC elongation and inhibiting FRC

contraction. Subsequent TC proliferative response was enhanced by the facilitated swelling. However, as both *in-silico* and *in-vivo* experiments have shown, proliferative response size is proportional to the starting frequency of cognate TCs [21, 59, 61] (S3 Fig). Therefore, with an inflated number of initial cognate TCs, the time-point at which swelling of LNs becomes helpful is likely shifted forward. Furthermore, the differential response of CD4<sup>+</sup> and CD8<sup>+</sup> TCs suggests modulating swelling of LNs could influence differential downstream immune response pathways. However, this differential behaviour is partly due to the assumption of earlier CD4<sup>+</sup> ‘Helper’ TC activation behaviour. The model could be used to further investigate scenarios whereby timing of CD4<sup>+</sup> and CD8<sup>+</sup> response may vary with different stimuli, by varying activation and differentiation parameters,

Validation of the model was achieved by replicating a range of published studies. Some slight differences were observed, for example, the effect of *in-silico* elimination of agDCs after 12 hours more closely matched *in-vivo* elimination of DCs after 1 hour rather than 12 hours. This is possibly because *in-vivo*, although most DCs were removed within 6 hours post-DT injection, 12 hours were required to eliminate virtually all DCs. Additionally, *in-silico* prevention of S1P<sub>1</sub>r down-regulation on activated TCs resulted in a smaller reduction in activated TC number (60-80%) than the 90% described by Lo *et al* 2004, but more than the 40% reported by Gräler *et al* 1997. However, this discrepancy may be because the 40% figure was recorded after accounting for reduced naive TCs homing to the LN due to the lack of S1P<sub>1</sub>r expression, prior to possible TC activation that was subsequently also affected.

A limitation of the model is that paracortical expansion is dependent only on TC numbers, but physiologically this is due to other factors that are not explicitly included, such as stromal cell proliferation rate. It would be a minor adaptation to the model to represent explicitly the effects of both innate and adaptive signalling pathways that regulate such factors. The use of a sigmoidal function to dictate paracortical volume allows an initial increase in TCs without triggering significant swelling. This reflects an initial inhibition of stromal cell proliferation by increased secretion of IFN type 1 [79]. The delayed increase in volume in response to TC number then reflects the switch in signalling at day 2 to favour LEC proliferation and expansion of LNs, through mechanisms such as DC-induced secretion of VEGF from stromal cells and increased

elasticity of FRC network [9, 80]. Furthermore, TC numbers are impacted by retention, but the effects of regulation of TC expression of chemokine-receptor CCR7 and the role of chemo-attraction in locating and retaining TCs in the paracortex was omitted [50]. When both CCR7 and S1P<sub>1</sub>r expression on TCs was inhibited *in-vivo*, the TCs migrated to the edges of the paracortex, due to the loss of chemo-attraction deep within the paracortex, but could not exit due to lack of S1P<sub>1</sub>r expression. Accordingly, inclusion of S1P<sub>1</sub>r down-regulation was prioritised over CCR7 but the identified strong influence of retention suggests future models should include a wider range of retentive influences [24].

In future iterations of the model, inclusion of additional factors such as lymph flow and pressure alterations (along with fluid exchange with nodal blood vessels), could also significantly improve the representation of swelling, and thus TC egress and retention. It has long been known that changes in hydrostatic and oncotic pressure differences across nodal blood vessel walls can reverse the net fluid exchange [81, 82]. Afferent lymphatic flow to the LNs also increases with immune response. Therefore, a key next step is to couple the ABM to a computational flow models while resident DCs in the LNs could also be added and the maximal permitted swelling increased to confirm the observed trends.

## Conclusion

Our results here suggest that although swelling of LNs may aid TC activation, avoidance of excessive swelling of LNs may boost effector TC response when initial TC response is small, for example, in immuno-suppressed patients or when optimizing vaccine design to minimise antigen dose. Moreover, retention of newly differentiated TCs via the modulation of the TC receptor Sphingosine-1-phosphate-1-receptor (S1P<sub>1</sub>r) showed that selective modulation on the small subset of effector TCs could strongly impact the efficiency of the TCs response and overcome loss in efficiency of TC response due to early enlargement. Although permanent blockade of effector TC egress has been utilised to treat multiple sclerosis, temporary retention of effector TCs to boost subsequent effector TC production presents as a novel mechanism. This finding also emphasizes the influence that retentive features, including factors such as chemokines, may have on



effector TC response, that may be more practical *in-vivo* targets to manipulate. 530

## Supporting information 531

**S1 File. Supplementary Methods** S1.1 T cell recruitment. S1.2 Agents and agent 532  
migration. S1.2 Agent interaction and signal integration. 533

**S2 File. Parameter File** Tables of parameter values and sources. 534

**S3 File. UML diagrams** description. 535

**S1 Fig. A class diagram displaying the underlying ABM structure.** The 536  
model is constructed using instructions in the 'context builder' class. The entire 537  
modelling domain is described by the context class, and each compartment of the 538  
domain is described by the GridCell class. In a 3D simulation, each grid cell can be 539  
queried to identify the 26 neighbouring grids and how many agents they contain. The 540  
TC class is a template for the T cell object produced and is instantiated thousands of 541  
times to create T cells with the same variables but slightly different values. A subclass 542  
of cognate T cells extends the template to contains more methods and variables relating 543  
to interaction and proliferative response 544

**S2 Fig. Captured phases of TC trafficking and response to AgDC stimuli.** 545  
Changes in proliferation and differentiation continued after the initial stimulus was no 546  
longer present. TC recruitment and TC egress changes also accompanied the response. 547

**S3 Fig. TC responses *in-silico* and *in-vivo* when proportion of cognate 548  
TCs was varied.** A. CD4<sup>+</sup> magnitude of response in dLNs of mice to injected antigen 549  
correlated to starting estimated frequency of cognate TCs in a sample of 1x10<sup>7</sup>TCs). B. 550  
Results *in-silico* showed an overall increase in response with increasing  $F_{cog}$  (n=8). 551  
Simulations using a wider range of  $F_{cog}$  values (C,D) confirmed no. of total cognate 552  
CD4<sup>+</sup> TCs and CD8<sup>+</sup> TCs increased linearly with  $F_{cog}$ . E. Mice were infected with 553  
VSV-M45 or VSV-ova with starting precursor CD8<sup>+</sup> frequencies of 7e-5,8e-5 and 13e-5 554  
respectively. The peak number of resulting TCs as a percent of overall CD8<sup>+</sup> TCs 555

present is shown. F. Simulations using the same  $F_{cog}$  *in-silico* showed a similar increasing trend with similar increase rate.

**S4 Fig. TC responses in-silico and in-vivo when a stimulus is abruptly abolished.** A. Transgenic Rats were used that would eliminate specific injected agDCs when the rat was injected with DT within 12 hours. The rats were injected with OT-1 CD8<sup>+</sup> TCs specific for agDCs that were subsequently injected. DT was then injected at 1h, 12 and 48hr (not-shown) later, curtailing the time that the agDCs would normally spend in the LN. Adapted from Prlic et al 2006. B. The simulated disrupted input stimuli achieved by curtailing the 60hr DC influx at 12+-2hr. C-D. The results of simulations (n=8). Mean (+-SEM) CD8<sup>+</sup> TCs were reduced 91% when the stimulus was curtailed at 12hrs compared to sustained entry for 60hrs. D. individual CD8<sup>+</sup> TC responses varied by a factor of 10 in an all or nothing response manner.

**S5 Fig. TC responses in-silico and in-vivo when S1P<sub>1</sub>r down-regulation is inhibited.** A. Pre-activated wildtype TCs (S1P<sub>1</sub>r) and pre-activated TCs over-expressing S1P<sub>1</sub>r (S1P<sub>1</sub>r++) were transferred into mice and further entry of TCs was blocked. 15hrs later there was a 90% reduction in retention of S1P<sub>1</sub>r++ activated TCs. Adapted from Lo et al 2005. B. The number of activated TCs in the LNs 24hours post-transfer dropped by 40% in transgenic mice with constitutive S1P<sub>1</sub>r expression while (C) the proliferative CD4<sup>+</sup> and CD8<sup>+</sup> TC response decreased to 20% and 6% of that of the wild-type mice. Adapted from Gräler et al 1997. D-F. Simulation results (n=10) where S1P<sub>1</sub>r down-regulation was prevented (-SP regulation), compared to baseline simulations (+SP regulation). Mean (+-SEM) total number of activated TCs present was reduced 60%, 72% and 81% at  $V_{max}=1.2, 1.5$  and 2. E. The mean (+-SEM) number of total CD8<sup>+</sup> TCs, was diminished to 25, 15 and 18% of control response at  $V_{Max}=1.2, 1.5$  and 2.0. F. CD4<sup>+</sup> TCs were similarly diminished to 8-10% of control at all values of  $V_{max}$ .

**S6 Fig. Additional data when  $V_{Max}$  was varied with  $T_{mid}=10e4$  TCs.** A. The number of non-cognate TCs a DC contacted increased with LN swelling. B. No significant difference was apparent when effector TCs exited were plotted over time. C. Total cognate CD4<sup>+</sup> TCs in the paracortex. D. Total CD8<sup>+</sup> TCs that exited the

paracortex. E,F. The total TCs present in the paracortex over the course of the simulation decreased as  $V_{max}$  increased, up to  $V_{max}=2.0$  at which no further difference was observed (H). G, I, J. No correlation was observed between swelling, TC and DC contact and total cognate  $CD4^+$  TCs or Effector/cognate  $CD8^+$  TCs that exited by day 10.

**S7 Fig. Cognate TC and DC contact and T cell activation while varying  $T_{mid}$  and permitting a larger swelling** A. At  $V_{max}=2.0$ , no correlation between cognate TC and DC contacts and  $T_{mid}$  was observed. B. With a higher  $T_{mid}$  of  $12e5$ , there remained a correlation between activated TCs and  $V_{Max}$ .

**S8 Fig. The activation of TCs at different maximal swelling when allowing TCs to return to HECs with a low probability increases with  $V_{max}$ .** ( $p < 10^{-5}$ ).

**S1 Table. Parameters that significantly influenced the number of effector TVs in the paracortex from day 3 to day 12 post-stimuli.** There is a greater correlation between maximum  $CD8^+$  TC proliferation and effector TCs produced in the expanding paracortex than in the fixed volume paracortex. In an expanding paracortex there is also a negative correlation with TC recruitment, and maximal paracortical swelling in the second week of the simulation.

**S2 Table. Parameters that significantly affected memory TCs number in the paracortex.** Data is only shown from day 5 to day 12 post-stimuli, as they are not produced in the first few days. At day 5,  $V_{max}$  still showed some positive correlation with memory TCs present but by day 7 shows a negative correlation.

**S3 Table. Parameters that significantly affected the number of memory TCs exited in the paracortex from day 5 to day 12 post-stimuli.**

## Acknowledgements

The authors gratefully acknowledge the help and unpublished data provided by Dr Samira Jamalain and assistance of Willy Bonneuil.

## References

1. Chang JE, Turley SJ. Stromal infrastructure of the lymph node and coordination of immunity. *Trends in Immunology*. 2014;36(1):30–39.
2. Mueller SN, Germain RN. Stromal cell contributions to the homeostasis and functionality of the immune system. *Nature Reviews Immunology*. 2009;9:618–29.
3. Chyou S, Benahmed F, Chen J, Kumar V, Tian S, Lipp M, et al. Coordinated regulation of lymph node vascular-stromal growth first by CD11c+ cells and then by T and B cells. *Journal of immunology*. 2011;187(11):5558–67.  
doi:10.4049/jimmunol.1101724.
4. Kumar V, Scandella E, Danuser R, Onder L, Nitschké M, Fukui Y, et al. Global lymphoid tissue remodeling during a viral infection is orchestrated by a B cell–lymphotoxin-dependent pathway. *Blood*. 2010;115(23):4725–4733.  
doi:10.1182/blood-2009-10-250118.
5. Yang CYY, Vogt TK, Favre S, Scarpellino L, Huang HYY, Tacchini-Cottier F, et al. Trapping of naive lymphocytes triggers rapid growth and remodeling of the fibroblast network in reactive murine lymph nodes. *PNAS*. 2014;111(1):E109–18.  
doi:10.1073/pnas.1312585111.
6. Hay JB, Hobbs BB. The flow of blood to lymph nodes and its relation to lymphocyte traffic and the immune response. *Journal of Experimental Medicine*. 1977;145(1):31–44.
7. Soderberg KA, Payne GW, Sato A, Medzhitov R, Segal SS, Iwasaki A. Innate control of adaptive immunity via remodeling of lymph node feed arteriole. *Proceedings of the National Academy of Sciences of the United States of America*. 2005;102(45):16315–16320. doi:10.1073/pnas.0506190102.
8. Cahill R, Frost H, Trnka Z. The effects of antigen on the migration of recirculating lymphocytes through single lymph nodes. *J Exp Med*. 1976;143(4):870–888. doi:10.1084/jem.143.4.870.

9. Acton SE, Farrugia AJ, Astarita JL, Mourao-Sa D, Jenkins RP, Nye E, et al. Dendritic cells control fibroblastic reticular network tension and lymph node expansion. *Nature*. 2014;514(7523):498–502.
10. Drayson MT, Smith ME. The sequence of changes in blood flow and lymphocyte influx to stimulated rat lymph nodes. *Immunology*. 1981;44:125–133.
11. Astarita JL, Cremasco V, Fu J, Darnell MC, Peck JR, Nieves-Bonilla JM, et al. The CLEC-2-podoplanin axis controls fibroblastic reticular cell contractility and lymph node microarchitecture. *Nature Imm*. 2015;16(1):75–84.
12. Gregory JL, Walter A, Alexandre YO, Hor JL, Liu R, Ma JZ, et al. Infection Programs Sustained Lymphoid Stromal Cell Responses and Shapes Lymph Node Remodeling upon Secondary Challenge. *Cell Reports*. 2017;18(2):406 – 418. doi:<https://doi.org/10.1016/j.celrep.2016.12.038>.
13. Kumar V, Chyou S, Stein J, Lu T. Optical projection tomography reveals dynamics of HEV growth after immunization with protein plus CFA and features shared with HEVs in acute. *Frontiers in immunology*. 2012;7(3):282.
14. Webster B, Ekland EH, Agle LM, Chyou S, Ruggieri R, Lu TT. Regulation of lymph node vascular growth by dendritic cells. *J Exp Med*. 2006;203(8):1903–13. doi:[10.1084/jem.20052272](https://doi.org/10.1084/jem.20052272).
15. Tzeng TC, Chyou S, Tian S, Webster B, Carpenter AC, Guaiquil VH, et al. CD11chi Dendritic Cells Regulate the Re-establishment of Vascular Quiescence and Stabilization after Immune Stimulation of Lymph Nodes. *The Journal of Immunology*. 2010;184(8):4247–4257. doi:[10.4049/jimmunol.0902914](https://doi.org/10.4049/jimmunol.0902914).
16. Tan KW, Yeo KP, Wong FHS, Lim HY, Khoo KL, Abastado JP, et al. Expansion of Cortical and Medullary Sinuses Restrains Lymph Node Hypertrophy during Prolonged Inflammation. *The Journal of Immunology*. 2012;188(8):4065–4080. doi:[10.4049/jimmunol.1101854](https://doi.org/10.4049/jimmunol.1101854).
17. Cyster JG. Chemokines, sphingosine-1-phosphate, and cell migration in secondary lymphoid organs. *Annu Rev Immunol*. 2005;23:127–59. doi:[10.1146/annurev.immunol.23.021704.115628](https://doi.org/10.1146/annurev.immunol.23.021704.115628).

18. Braun A, Worbs T, Moschovakis G, Halle S, Hoffmann K, Bölter J, et al. Afferent lymph-derived T cells and DCs use different chemokine receptor CCR7-dependent routes for entry into the lymph node and intranodal migration. *Nat Immunol.* 2011;12(9):879–87. doi:10.1038/ni.2085.
19. von Andrian UH, Mempel TR. Homing and cellular traffic in lymph nodes. *Nature reviews Immunology.* 2003;3(11):867–78. doi:10.1038/nri1222.
20. Blattman JN, Antia R, Sourdive DJ, Wang X, Kaech SM, Murali-Krishna K, et al. Estimating the Precursor Frequency of Naive Antigen-specific CD8 T Cells. *The Journal of Experimental Medicine.* 2002;195(5):657–664.
21. Jenkins MK, Moon JJ. The role of naïve T cell precursor frequency and recruitment in dictating immune response magnitude. *Journal of Immunology (Baltimore, Md : 1950).* 2012;188(9):4135–4140.
22. Bousso P. T-cell activation by dendritic cells in the lymph node: lessons from the movies. *Nature Reviews Immunology.* 2008;8:675–84.
23. Pennock ND, White JT, Cross EW, Cheney EE, Tamburini BA, Kedl RM. T cell responses: naïve to memory and everything in between. *Advances in Physiology Education.* 2013;37(4):273–283.
24. Benechet AP, Menon M, Xu D, Samji T, Maher L, Murooka TT, et al. T cell-intrinsic S1PR1 regulates endogenous effector T-cell egress dynamics from lymph nodes during infection. *PNAS.* 2016;113(8):2182–2187. doi:10.1073/pnas.1516485113.
25. Youngblood B, Hale JS, Kissick HT, Ahn E, Xu X, Wieland A, et al. Effector CD8 T cells dedifferentiate into long-lived memory cells. *Nature.* 2017;552(7685):404–9.
26. Wherry EJ, Ahmed R. Memory CD8 T-Cell Differentiation during Viral Infection. *Journal of Virology.* 2004;78(11):5535–5545. doi:10.1128/JVI.78.11.5535-5545.2004.

27. van Stipdonk MJB, Lemmens EE, Schoenberger SP. Naïve CTLs require a single brief period of antigenic stimulation for clonal expansion and differentiation. *Nature Immunology*. 2001;2:423–9.
28. Bevan MJ. Helping the CD8+ T-cell response. *Nature Reviews Immunology*. 2004;4:595–602.
29. Schrum AG, Palmer E, Turka LA. Distinct temporal programming of naive CD4(+) T cells for cell division versus TCR-dependent death susceptibility by antigen-presenting macrophages. *European journal of immunology*. 2005;35(2):449–459.
30. Parijs LV, Abbas AK. Homeostasis and Self-Tolerance in the Immune System: Turning Lymphocytes off. *Science*. 1998;280(5361):243–248. doi:10.1126/science.280.5361.243.
31. Matloubian M, Lo C, Cinamon G, Lesneski M, Xu Y. Lymphocyte egress from thymus and peripheral lymphoid organs is dependent on S1P receptor 1. *Nature*. 2004;427(6972):355–60. doi:10.1038/nature02284.
32. Lo C, Xu Y, Proia R, Cyster J. Cyclical modulation of sphingosine-1-phosphate receptor 1 surface expression during lymphocyte recirculation and relationship to lymphoid organ transit. *Journal of Experimental Medicine*. 2005;2(201):291–301. doi:10.1084/jem.20041509.
33. Cyster J, Schwab S. Sphingosine-1-phosphate and lymphocyte egress from lymphoid organs. *Annual review of immunology*. 2012;30:69–94. doi:10.1146/annurev-immunol-020711-075011.
34. Grigorova I, Schwab S, Phan T, Pham T. Cortical sinus probing, S1P1-dependent entry and flow-based capture of egressing T cells. *Nature Imm*. 2009;10:58–65. doi:10.1038/ni.1682.
35. Hunter M, Teijeira A, Halin C. T cell trafficking through lymphatic vessels. *Frontiers in Immunology*. 2016;7:613.
36. Bogle G, Dunbar PR. Simulating T-cell motility in the lymph node paracortex with a packed lattice geometry. *Imm Cell Biol*. 2008;86(8):676–687.

37. Bogle G, Dunbar PR. Agent-based simulation of T-cell activation and proliferation within a lymph node. *Imm Cell Biol.* 2009;88(2):172–179.
38. Bogle G, Dunbar PR. On-lattice simulation of T cell motility, chemotaxis, and trafficking in the lymph node paracortex. *PloS one.* 2012;7(9):e45258.
39. Brown LV, Gaffney EA, Wagg J, Coles MC. An in silico model of cytotoxic T-lymphocyte activation in the lymph node following short peptide vaccination. *Journal of the Royal Society, Interface.* 2018;15(140):2018.0041.
40. Celli S, Day M, Müller AJ, Molina-Paris C, Lythe G, Bouso P. How many dendritic cells are required to initiate a T-cell response? *Blood.* 2012;120(19):3945–3948. doi:10.1182/blood-2012-01-408260.
41. Gong C, Mattila JT, Miller M, Flynn JL, Linderman JJ, Kirschner D. Predicting lymph node output efficiency using systems biology. *Journal of Theoretical Biology.* 2013;335:169 – 184.
42. Gong C, Linderman J, Kirschner D. Harnessing the Heterogeneity of T Cell Differentiation Fate to Fine-Tune Generation of Effector and Memory T Cells. *Frontiers in Immunology.* 2014;5:57. doi:10.3389/fimmu.2014.00057.
43. Ziraldo C, Gong C, Kirschner DE, Linderman JJ. Strategic Priming with Multiple Antigens can Yield Memory Cell Phenotypes Optimized for Infection with *Mycobacterium tuberculosis*: A Computational Study. *Frontiers in Microbiology.* 2015;6. doi:10.3389/fmicb.2015.01477.
44. Baldazzi V, Paci P, Bernaschi M, Castiglione F. Modeling lymphocyte homing and encounters in lymph nodes. *BMC Bioinformatics.* 2009;10:387. doi:10.1186/1471-2105-10-387.
45. Jafarnejad M, Woodruff MC, Zawieja DC, Carroll MC, Moore J. Modeling Lymph Flow and Fluid Exchange with Blood Vessels in Lymph Nodes. *Lymphat Res Biol.* 2015;13(4):234–247. doi:10.1089/lrb.2015.0028.
46. Jafarnejad M, Zawieja DC, Brook BS, Nibbs RJB, Moore JE. A Novel Computational Model Predicts Key Regulators of Chemokine Gradient



- Formation in Lymph Nodes and Site-Specific Roles for CCL19 and ACKR4. *The Journal of Immunology*. 2017;199(7):2291–2304. doi:10.4049/jimmunol.1700377.
47. Kuka M, Iannaccone M. The role of lymph node sinus macrophages in host defense. *Annals of the New York Academy of Sciences*. 2014;1319(1):38–46. doi:10.1111/nyas.12387.
48. Girard JP, Moussion C, Förster R. HEVs, lymphatics and homeostatic immune cell trafficking in lymph nodes. *Nat Rev Immunol*. 2012;12(11):762–73. doi:10.1038/nri3298.
49. Shio L, Rosen D, Brdiková N, Xu Y, An J. CD69 acts downstream of interferon-I/I2 to inhibit S1P1 and lymphocyte egress from lymphoid organs. *Nature*. 2006;440(7083):540–4. doi:10.1038/nature04606.
50. Pham T, Okada T, Matloubian M, Lo C, Cyster J. S1P 1 receptor signaling overrides retention mediated by Gi-coupled receptors to promote T cell egress. *Immunity*. 2008;28(1):122–133.
51. Garris CS, Blaho VA, Hla T, Han MH. Sphingosine-1-phosphate receptor 1 signalling in T cells: trafficking and beyond. *Immunology*. 2014;142(3):347–353.
52. Cella M, Salio M, Sakakibara Y, Langen H, Julkunen I, Lanzavecchia A. Maturation, Activation, and Protection of Dendritic Cells Induced by Double-stranded RNA. *The Journal of Experimental Medicine*. 1999;189(5):821–829.
53. Kukutsch NA, Rossner S, Austyn JM, Schuler G, Lutz MB. Formation and Kinetics of MHC Class I-Ovalbumin Peptide Complexes on Immature and Mature Murine Dendritic Cells. *Journal of Investigative Dermatology*. 2000;115(3):449 – 453. doi:<https://doi.org/10.1046/j.1523-1747.2000.00084.x>.
54. Cella M, Engering A, Pinet V, Pieters J, Lanzavecchia A. Inflammatory stimuli induce accumulation of MHC class II complexes on dendritic cells. *Nature*. 1997;388:782–7.

55. Baumgartner C, Ferrante A, Nagaoka M, Gorski J, Malherbe LP. Peptide-MHC Class II Complex Stability Governs CD4 T Cell Clonal Selection. *Journal of immunology* (Baltimore, Md : 1950). 2010;184(2):573–581.
56. Latif R, de Rosbo NK, Amarant T, Rappuoli R, Sappler G, Ben-Nun A. Reversal of the CD4(+)/CD8(+) T-Cell Ratio in Lymph Node Cells upon In Vitro Mitogenic Stimulation by Highly Purified, Water-Soluble S3-S4 Dimer of Pertussis Toxin. *Infection and Immunity*. 2001;69(5):3073–3081. doi:10.1128/IAI.69.5.3073-3081.2001.
57. Linderman JJ, Riggs T, Pande M, Miller M, Marino S, Kirschner DE. Characterizing the Dynamics of CD4+ T Cell Priming within a Lymph Node. *The Journal of Immunology*. 2010;184(6):2873–2885. doi:10.4049/jimmunol.0903117.
58. Smith CM, Wilson NS, Waithman J, Villadangos JA, Carbone FR, Heath WR, et al. Cognate CD4+ T cell licensing of dendritic cells in CD8+ T cell immunity. *Nature Immunology*. 2004;5:1143–8.
59. Obar JJ, Khanna KM, Lefrançois L. Endogenous naive CD8+ T cell precursor frequency regulates primary and memory responses to infection. *Immunity*. 2008;28(6):859–869. doi:10.1016/j.immuni.2008.04.010.
60. Marino S, Hogue IB, Ray CJ, Kirschner DE. A methodology for performing global uncertainty and sensitivity analysis in systems biology. *Journal of Theoretical Biology*. 2008;254(1):178 – 196. doi:<https://doi.org/10.1016/j.jtbi.2008.04.011>.
61. Moon JJ, Chu HH, Pepper M, McSorley SJ, Jameson SC, Kedl RM, et al. Naive CD4(+) T cell frequency varies for different epitopes and predicts repertoire diversity and response magnitude. *Immunity*. 2007;27(2):203–213.
62. Kaech SM, Ahmed R. Memory CD8+ T cell differentiation: initial antigen encounter triggers a developmental program in naïve cells. *Nature Immunology*. 2001;2:415–22.

63. Martín-Fontecha A, Sebastiani S, Höpken UE, Ugucioni M, Lipp M, Lanzavecchia A, et al. Regulation of Dendritic Cell Migration to the Draining Lymph Node. *Journal of Experimental Medicine*. 2003;198(4):615–621. doi:10.1084/jem.20030448.
64. Prlic M, Hernandez-Hoyos G, Bevan MJ. Duration of the initial TCR stimulus controls the magnitude but not functionality of the CD8+ T cell response. *Journal of Experimental Medicine*. 2006;203(9):2135–2143. doi:10.1084/jem.20060928.
65. Gräler MH, Huang MC, Watson S, Goetzl EJ. Immunological Effects of Transgenic Constitutive Expression of the Type 1 Sphingosine 1-Phosphate Receptor by Mouse Lymphocytes. *The Journal of Immunology*. 2005;174(4):1997–2003. doi:10.4049/jimmunol.174.4.1997.
66. Park E, Peixoto A, Imai Y, Goodarzi A, Cheng G. Distinct roles for LFA-1 affinity regulation during T-cell adhesion, diapedesis, and interstitial migration in lymph nodes. *Blood*. 2010;115(8):1572–81.
67. Boscacci R, Pfeiffer F, Gollmer K, Sevilla A. Comprehensive analysis of lymph node stroma-expressed Ig superfamily members reveals redundant and nonredundant roles for ICAM-1, ICAM-2, and VCAM-1 in lymphocyte homing. *Blood*. 2010;116(6):915–25.
68. Park C, Hwang I, Sinha R, Kamenyeva O. Lymph node B lymphocyte trafficking is constrained by anatomy and highly dependent upon chemo-attractant desensitization. *Blood*. 2012;119(4):978–989.
69. Miller MJ, Wei SH, Parker I, Cahalan MD. Two-photon imaging of lymphocyte motility and antigen response in intact lymph node. *Science*. 2002;296(5574):1869–73. doi:10.1126/science.1070051.
70. Beltman JB, Marée AFM, Lynch JN, Miller MJ, de Boer RJ. Lymph node topology dictates T cell migration behavior. *Journal of Experimental Medicine*. 2007;204(4):771–780. doi:10.1084/jem.20061278.

71. Tomura M, Yoshida N, Tanaka J. Monitoring cellular movement in vivo with photoconvertible fluorescence protein 'Kaede' transgenic mice. *PNAS*. 2008;105(31):10871–6. doi:10.1073/pnas.0802278105.
72. Tedla N, Wang H, HP M. Regulation of T lymphocyte trafficking into lymph nodes during an immune response by the chemokines macrophage inflammatory protein (MIP)-1 and MIP-1I2. *The Journal of Imm*. 1998;161(10):5663–72.
73. Hugues S, Fetler L, Bonifaz L, Helft J, Amblard F, Amigorena S. Distinct T cell dynamics in lymph nodes during the induction of tolerance and immunity. *Nature Immunology*. 2004;5:1235–42.
74. Kinjyo I, Qin J, Tan SY, Wellard CJ, Mrass P, Ritchie W, et al. Real-time tracking of cell cycle progression during CD8+ effector and memory T-cell differentiation. *Nature Communications*. 2015;6:6301.
75. Homann D, Teyton L, Oldstone MBA. Differential regulation of antiviral T-cell immunity results in stable CD8+ but declining CD4+ T-cell memory. *Nature Medicine*. 2001;7(8):913–919.
76. Hall J, Morris B. The immediate effect of antigens on the cell output of a lymph node. *British journal of experimental pathology*. 1965;46(4):450–454.
77. Chun J, Hartung HP. Mechanism of action of oral fingolimod (FTY720) in multiple sclerosis. *Clinical neuropharmacology*. 2010;33(2):91–101.
78. Foulds KE, Zenewicz LA, Shedlock DJ, Jiang J, Troy AE, Shen H. Cutting Edge: CD4 and CD8 T Cells Are Intrinsically Different in Their Proliferative Responses. *The Journal of Immunology*. 2002;168(4):1528–1532. doi:10.4049/jimmunol.168.4.1528.
79. Lucas ED, Finlon JM, Burchill MA, McCarthy MK, Morrison TE, Colpitts TM, et al. Type 1 IFN and PD-L1 Coordinate Lymphatic Endothelial Cell Expansion and Contraction during an Inflammatory Immune Response. *The Journal of Immunology*. 2018;201(6):1735–1747. doi:10.4049/jimmunol.1800271.

80. Lucas ED, Tamburini BAJ. Lymph Node Lymphatic Endothelial Cell Expansion and Contraction and the Programming of the Immune Response. *Frontiers in Immunology*. 2019;10:36. doi:10.3389/fimmu.2019.00036.
81. Adair TH, Guyton AC. Modification of lymph by lymph nodes. II. Effect of increased lymph node venous blood pressure. *American Journal of Physiology-Heart and Circulatory Physiology*. 1983;245(4):H616–H622. doi:10.1152/ajpheart.1983.245.4.H616.
82. Adair T, Guyton A. Modification of lymph by lymph nodes. III. Effect of increased lymph hydrostatic pressure. *The American journal of physiology*. 1985;249:H777–82. doi:10.1152/ajpheart.1985.249.4.H777.

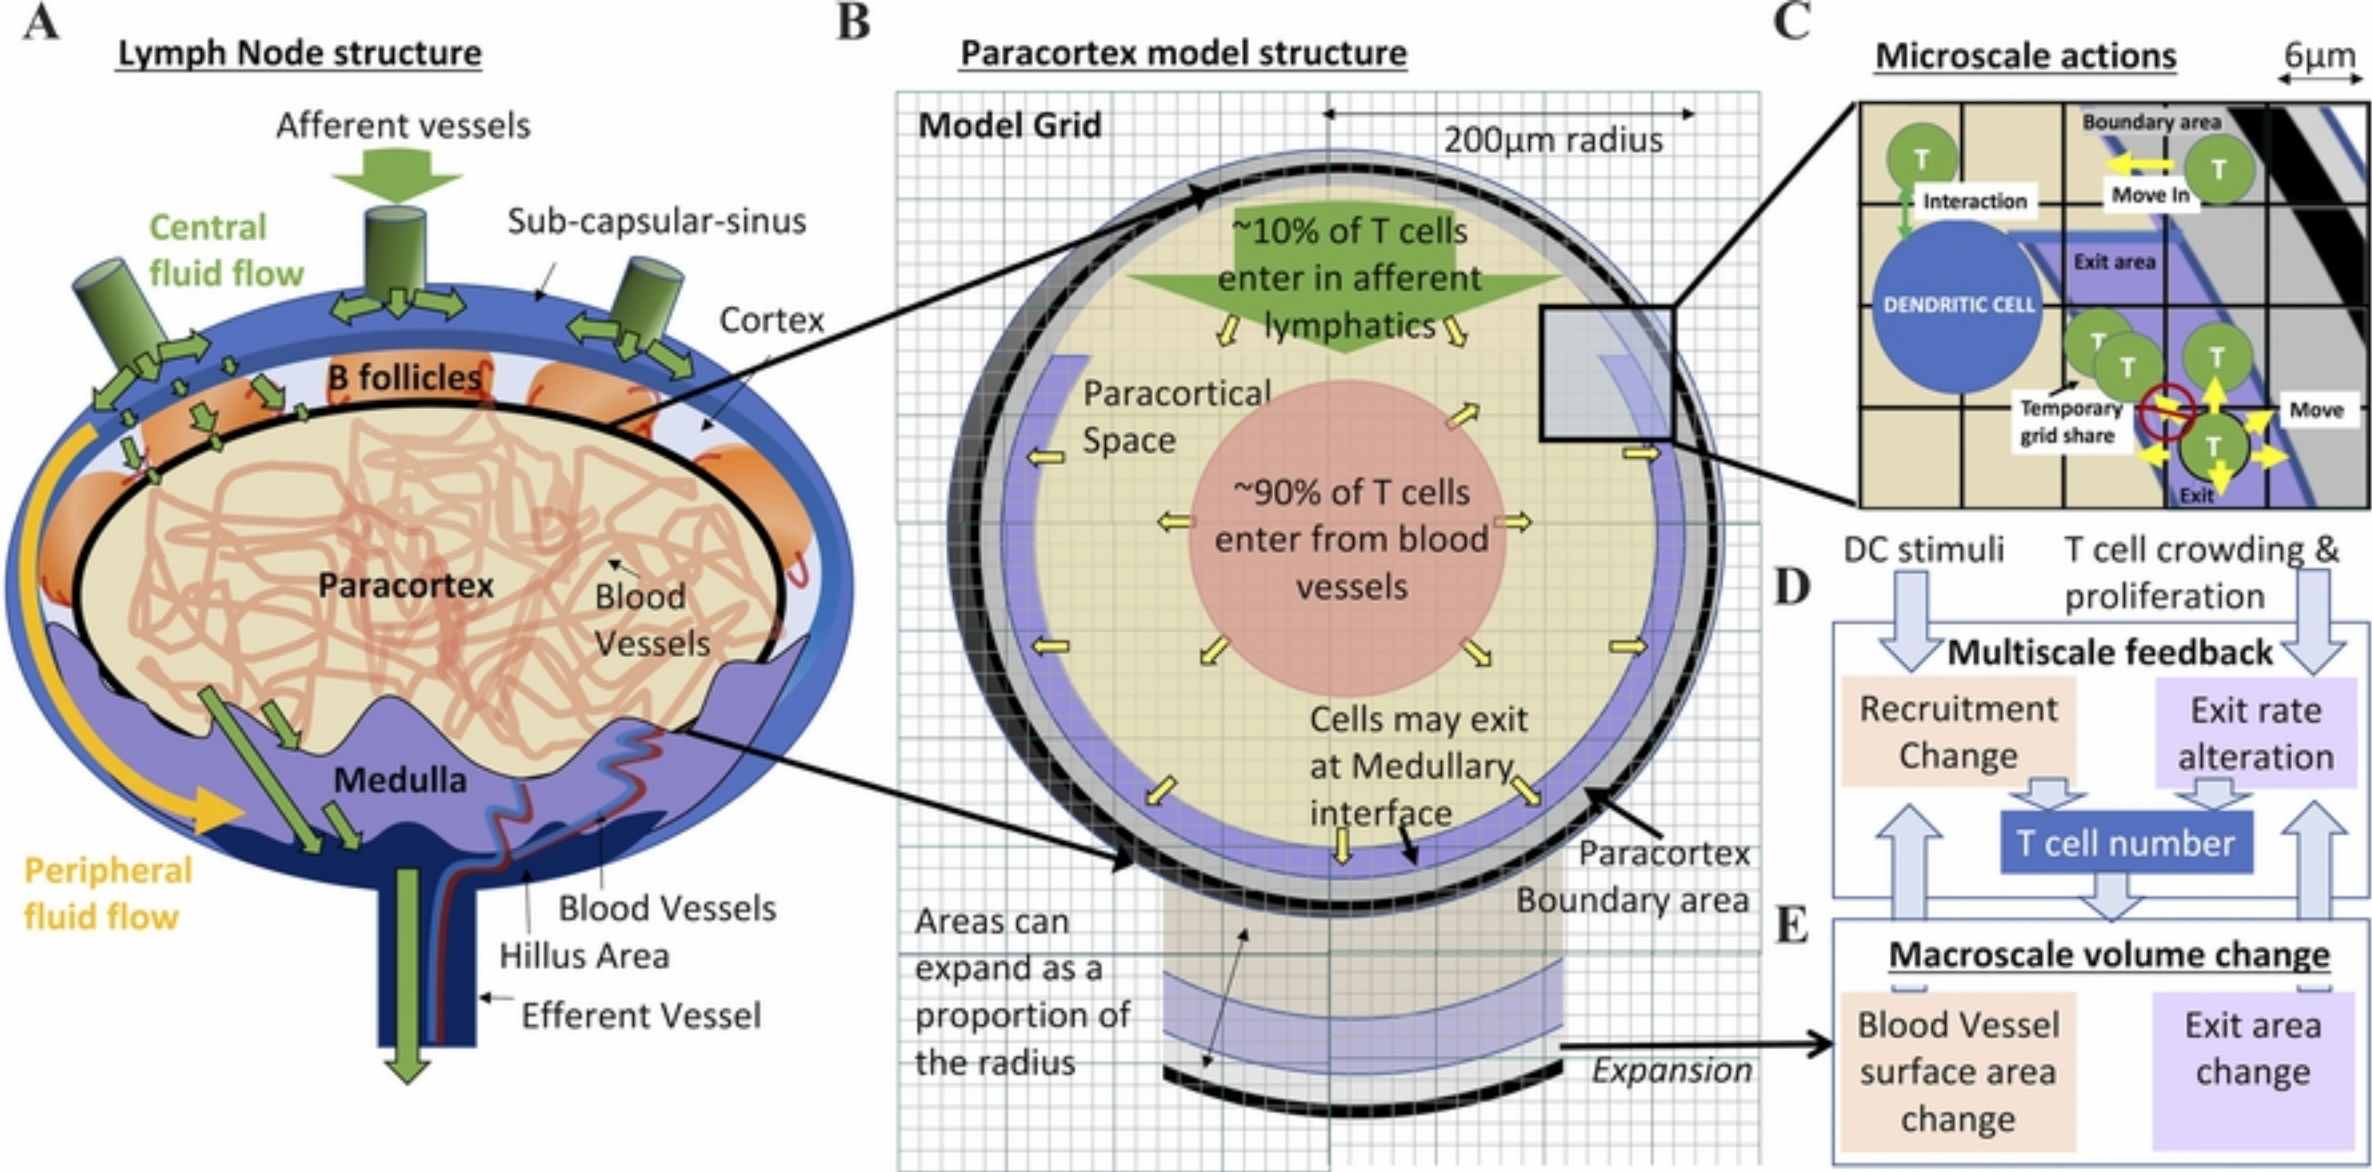

Figure\_1



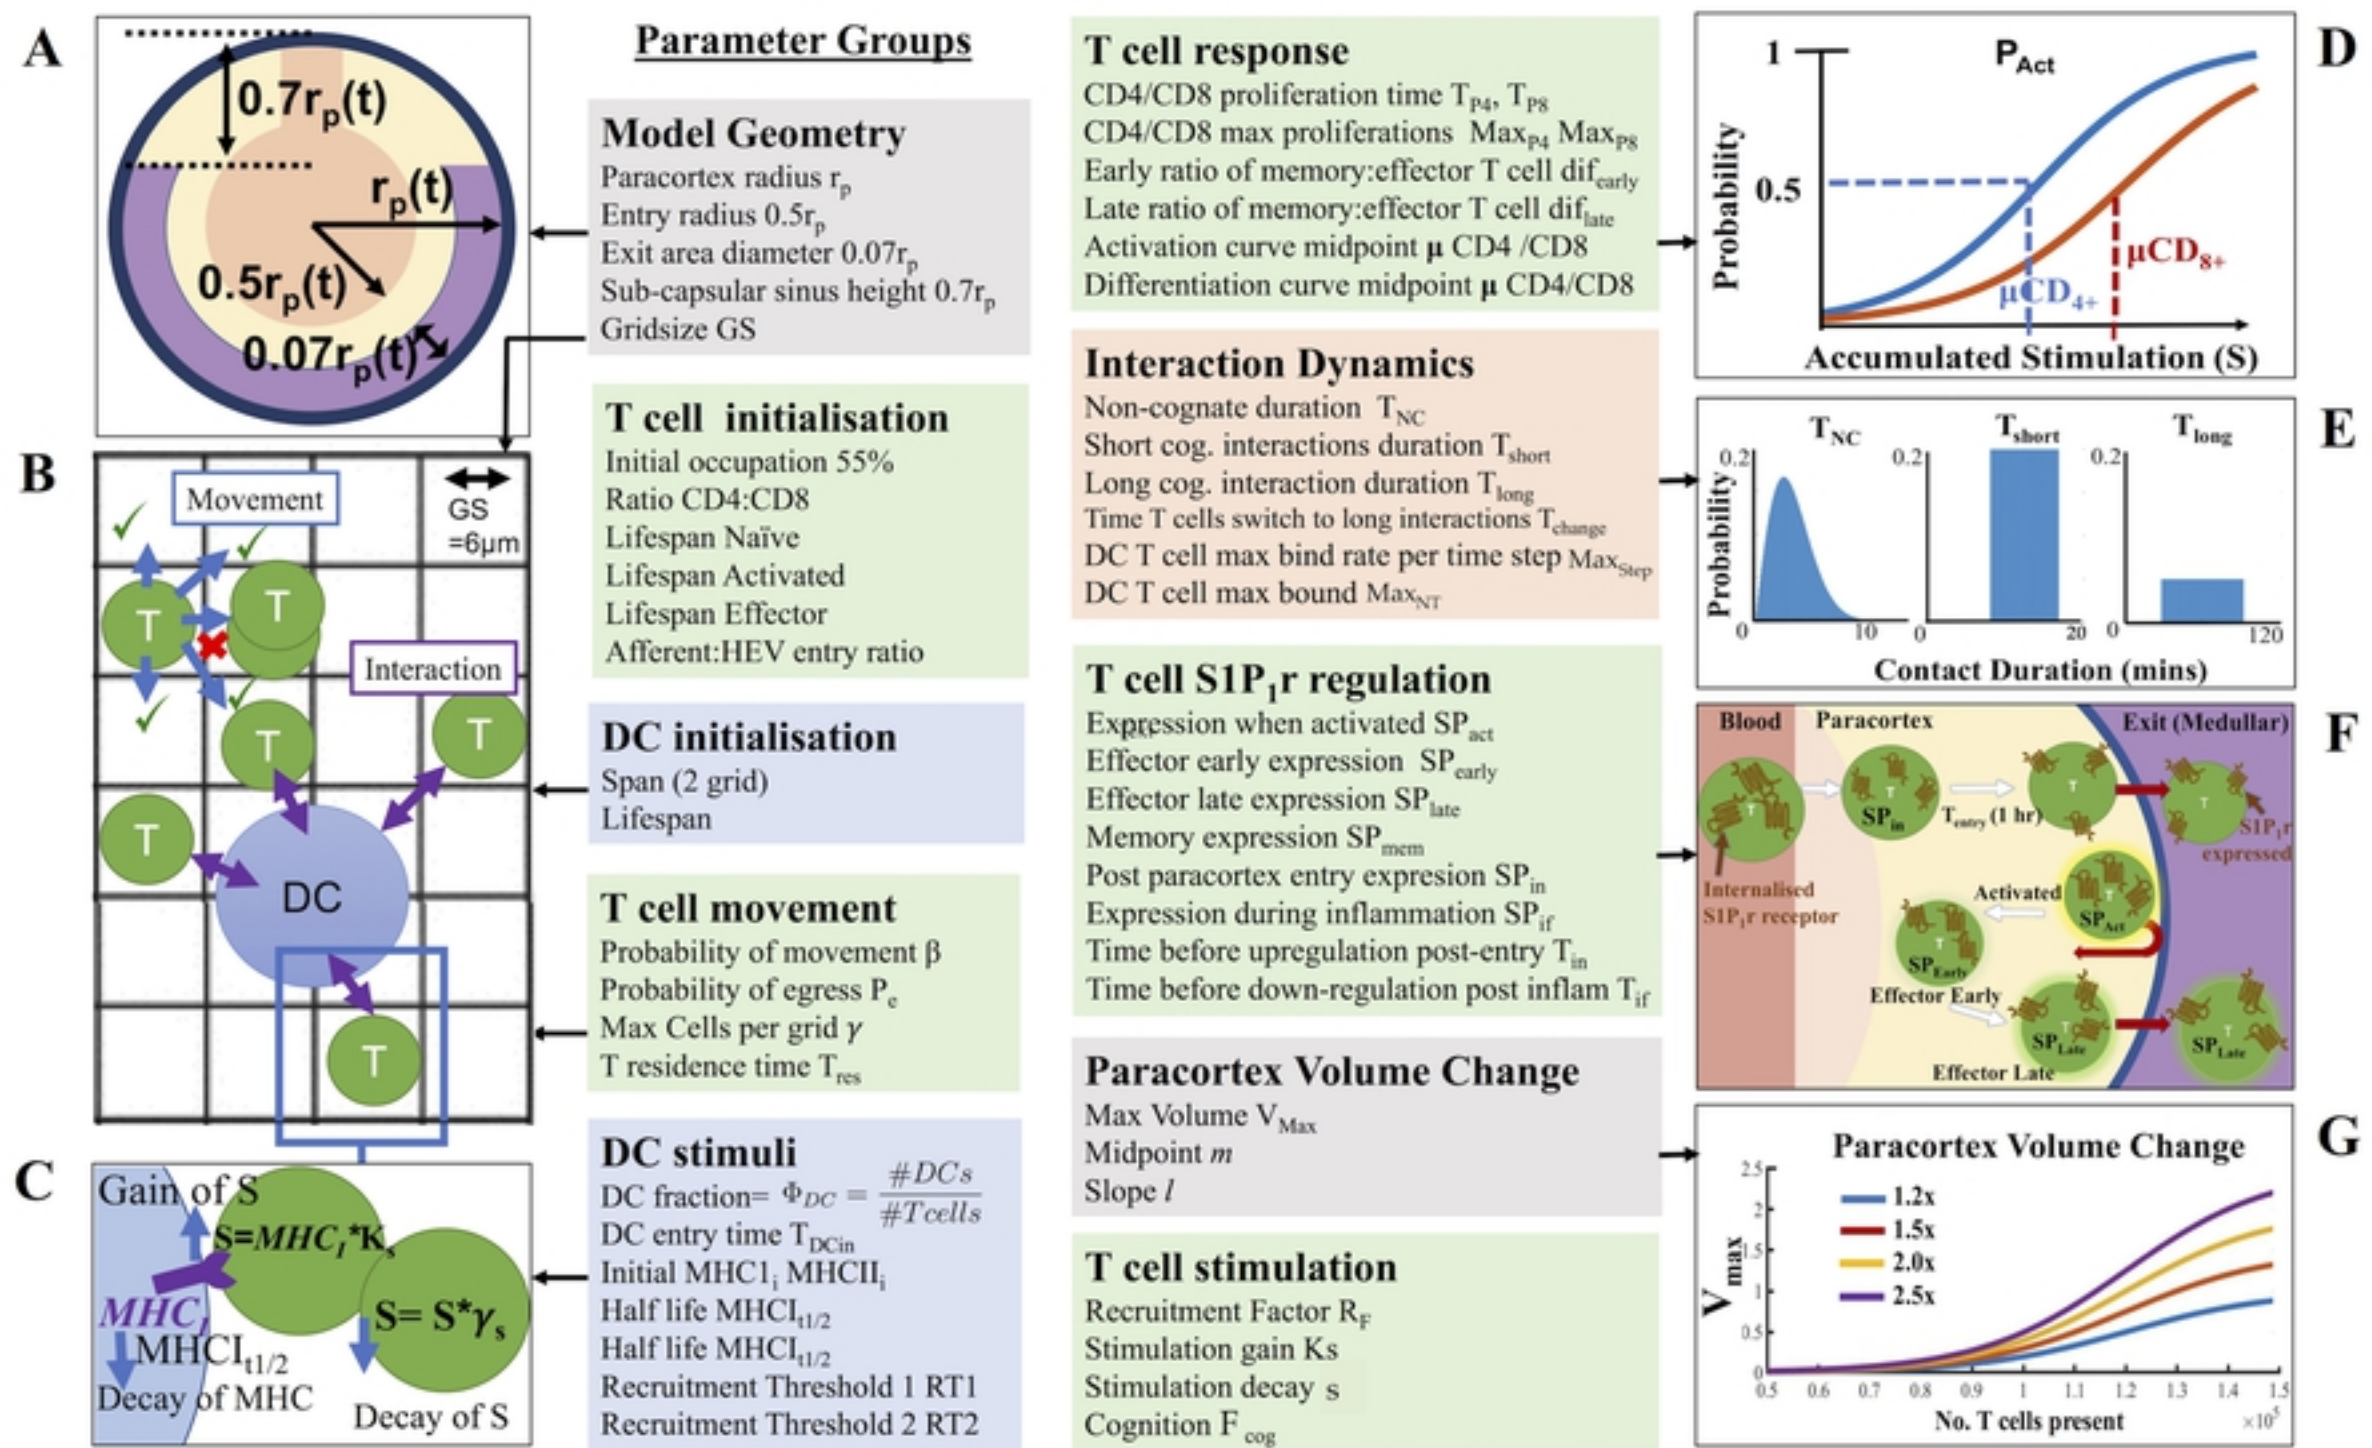

Figure\_2

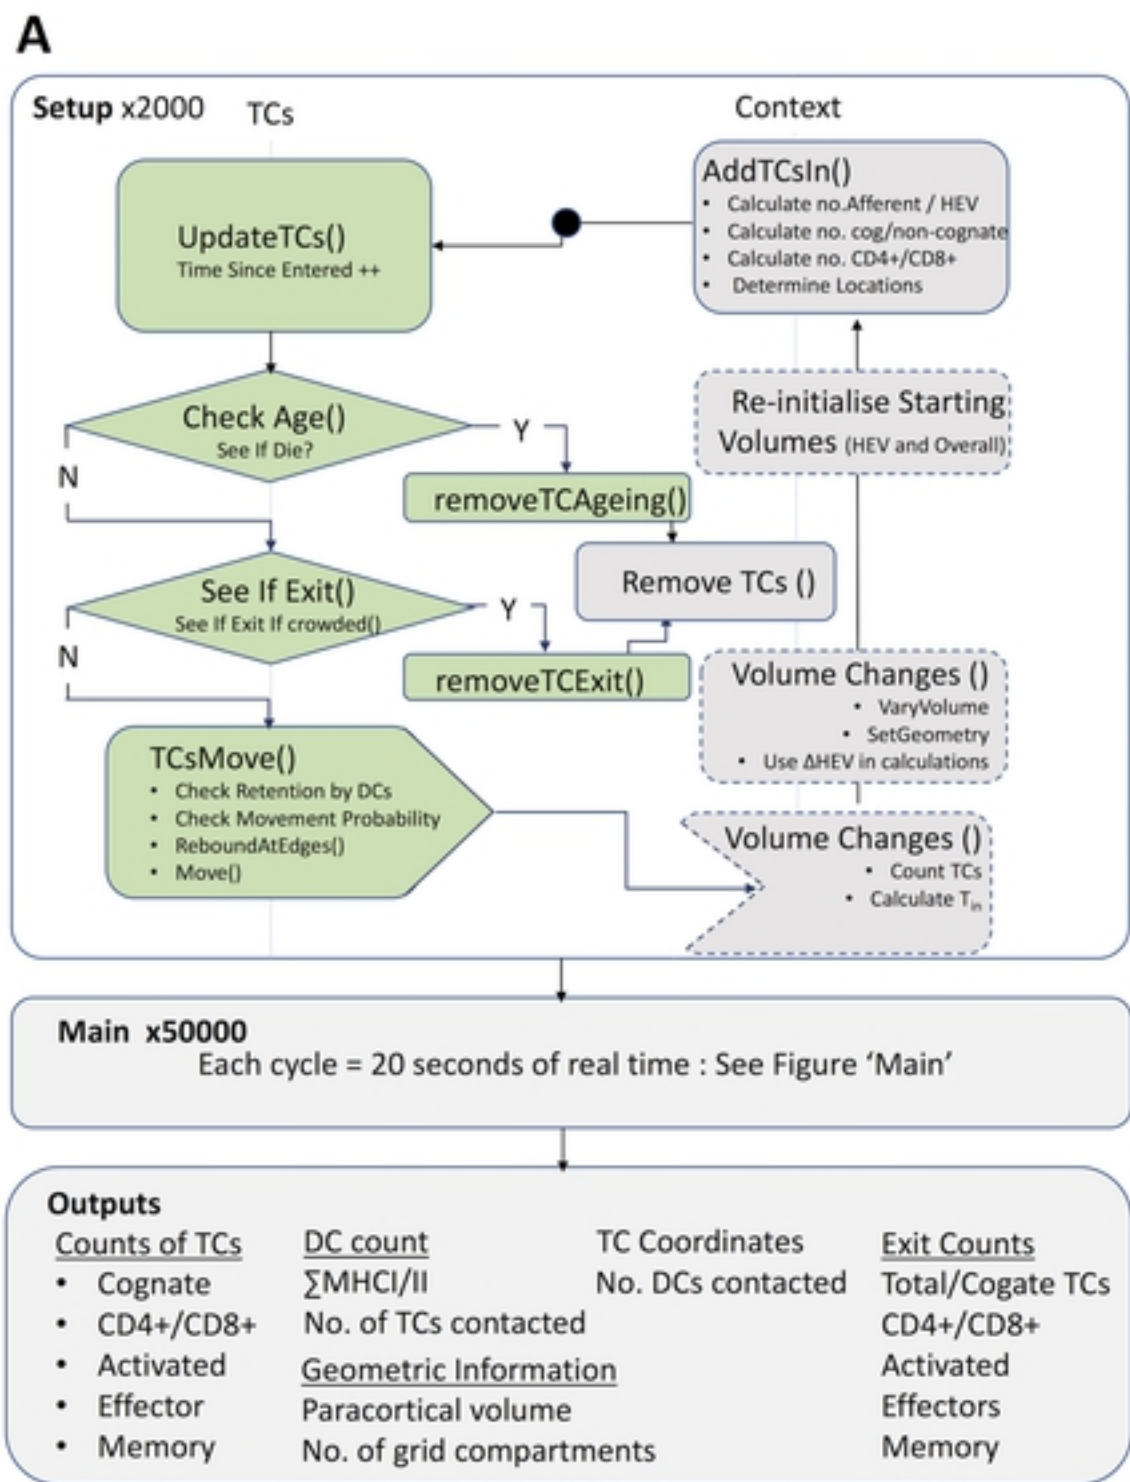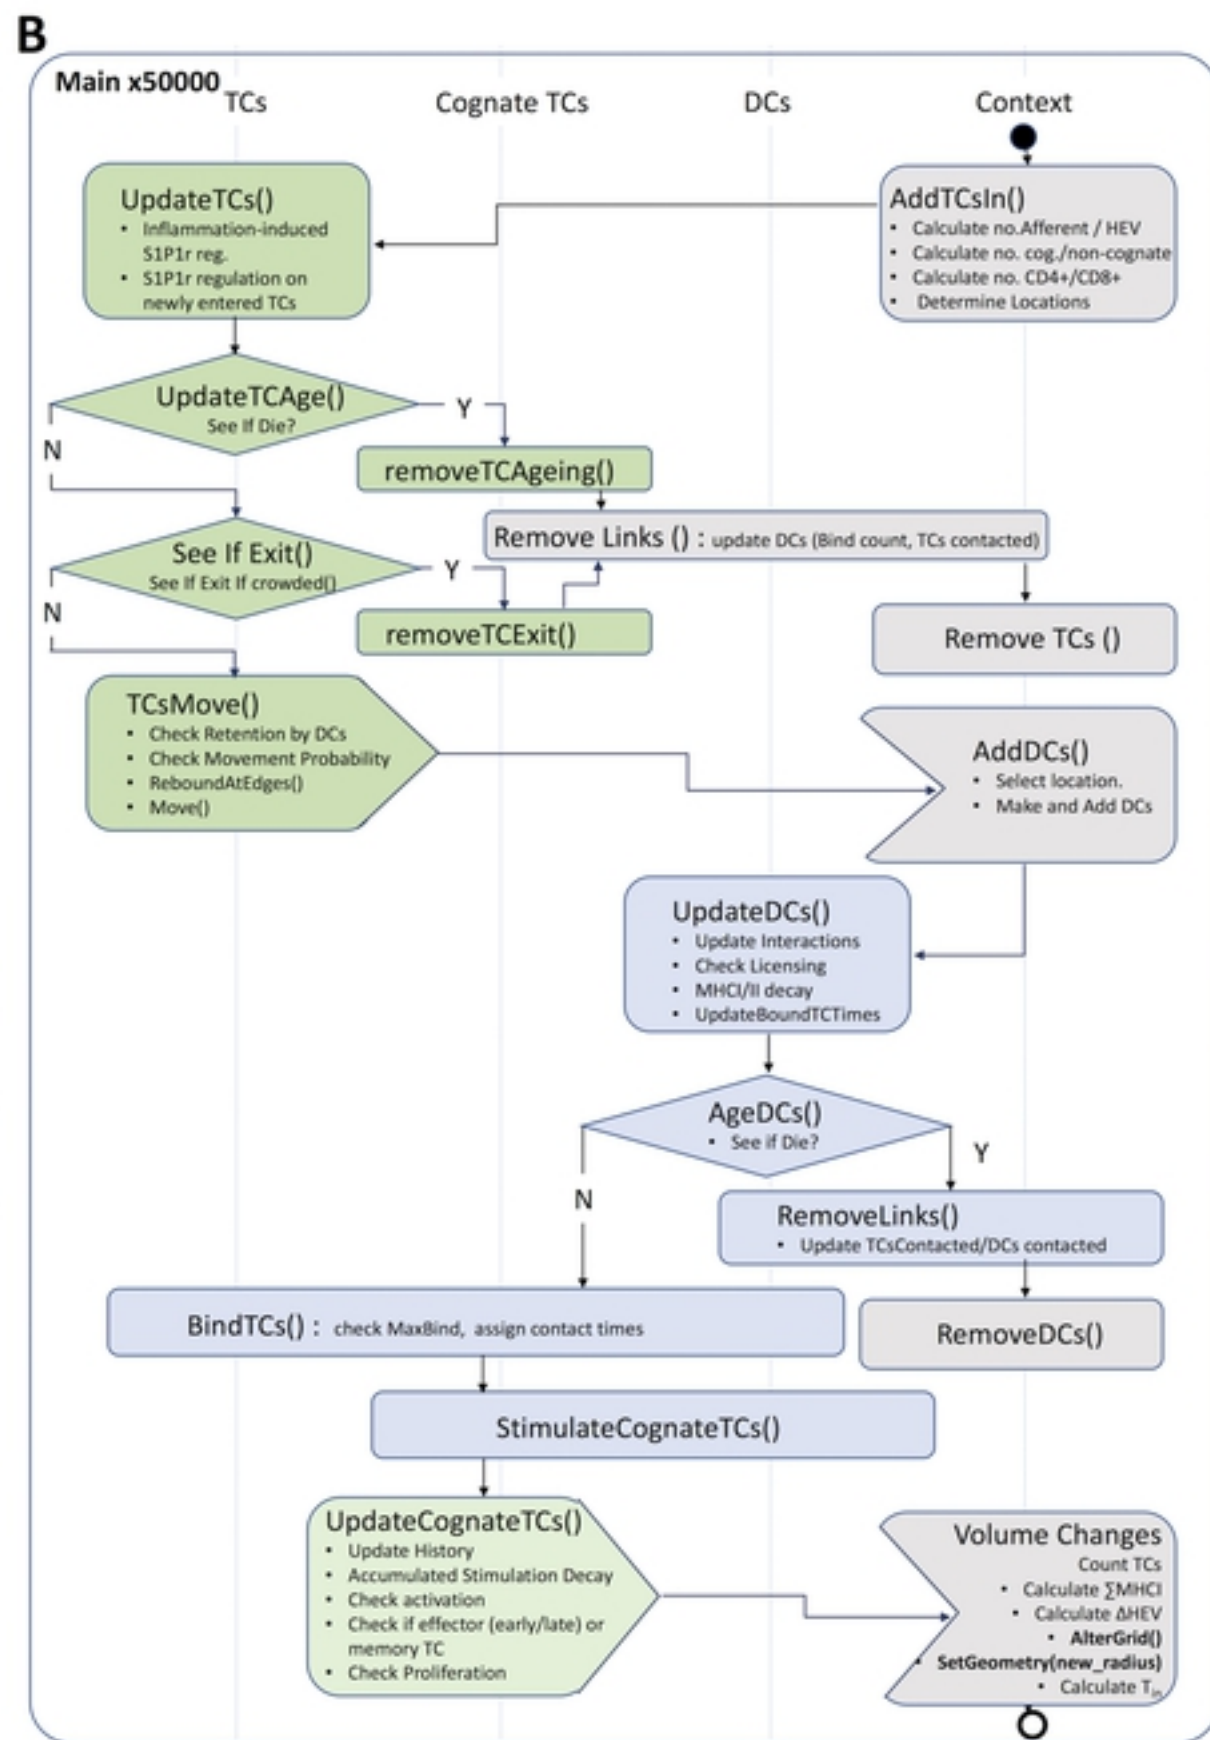

Figure\_3



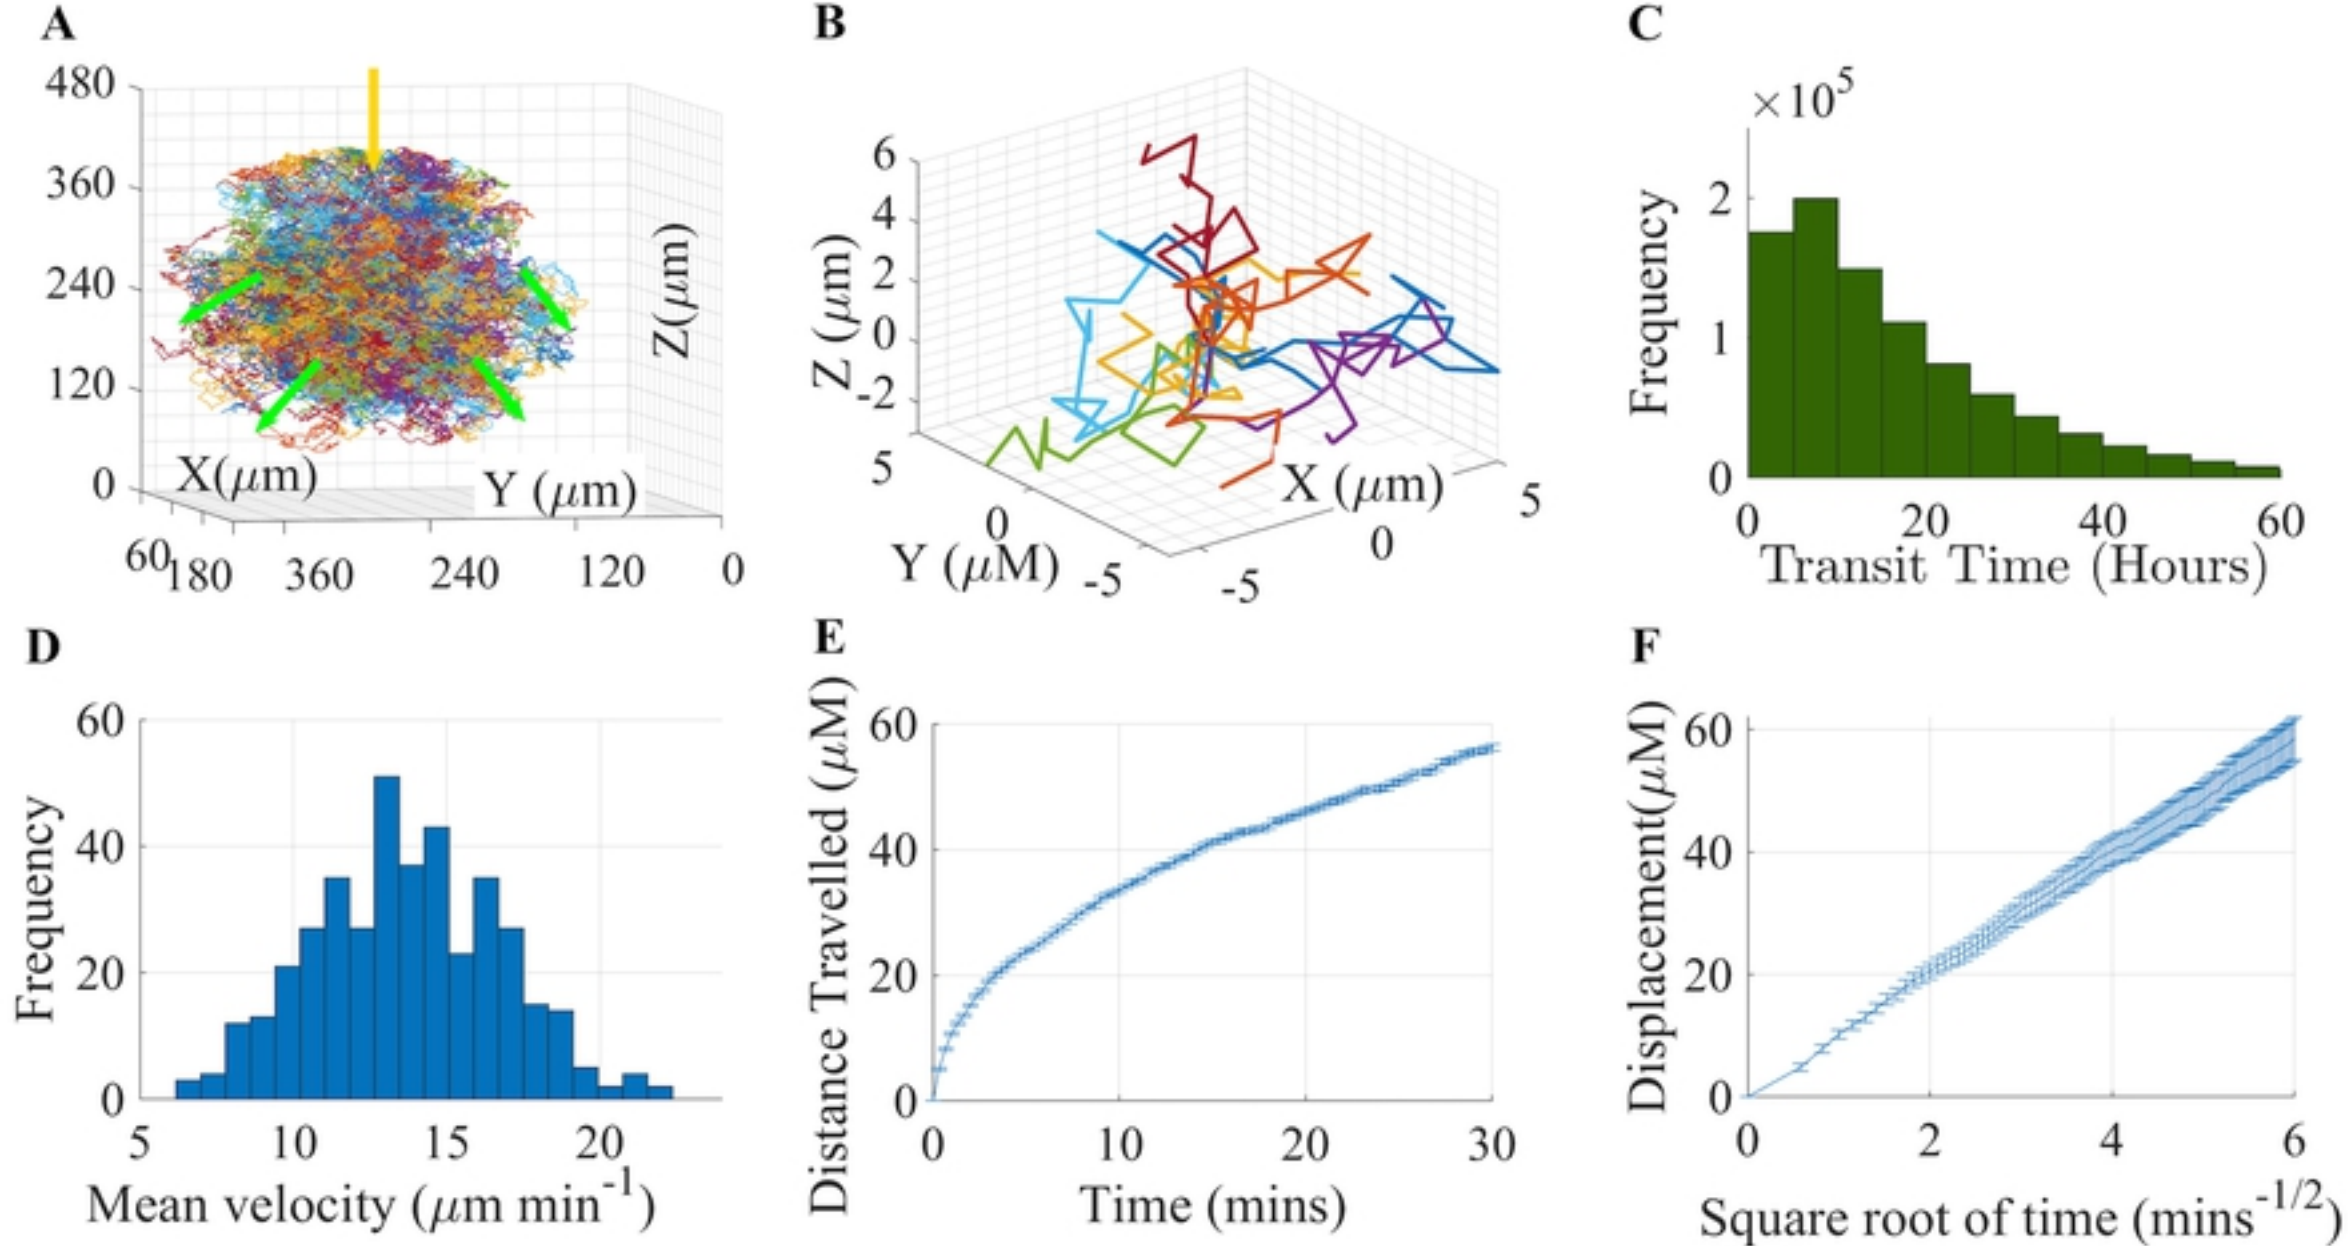

Figure\_4

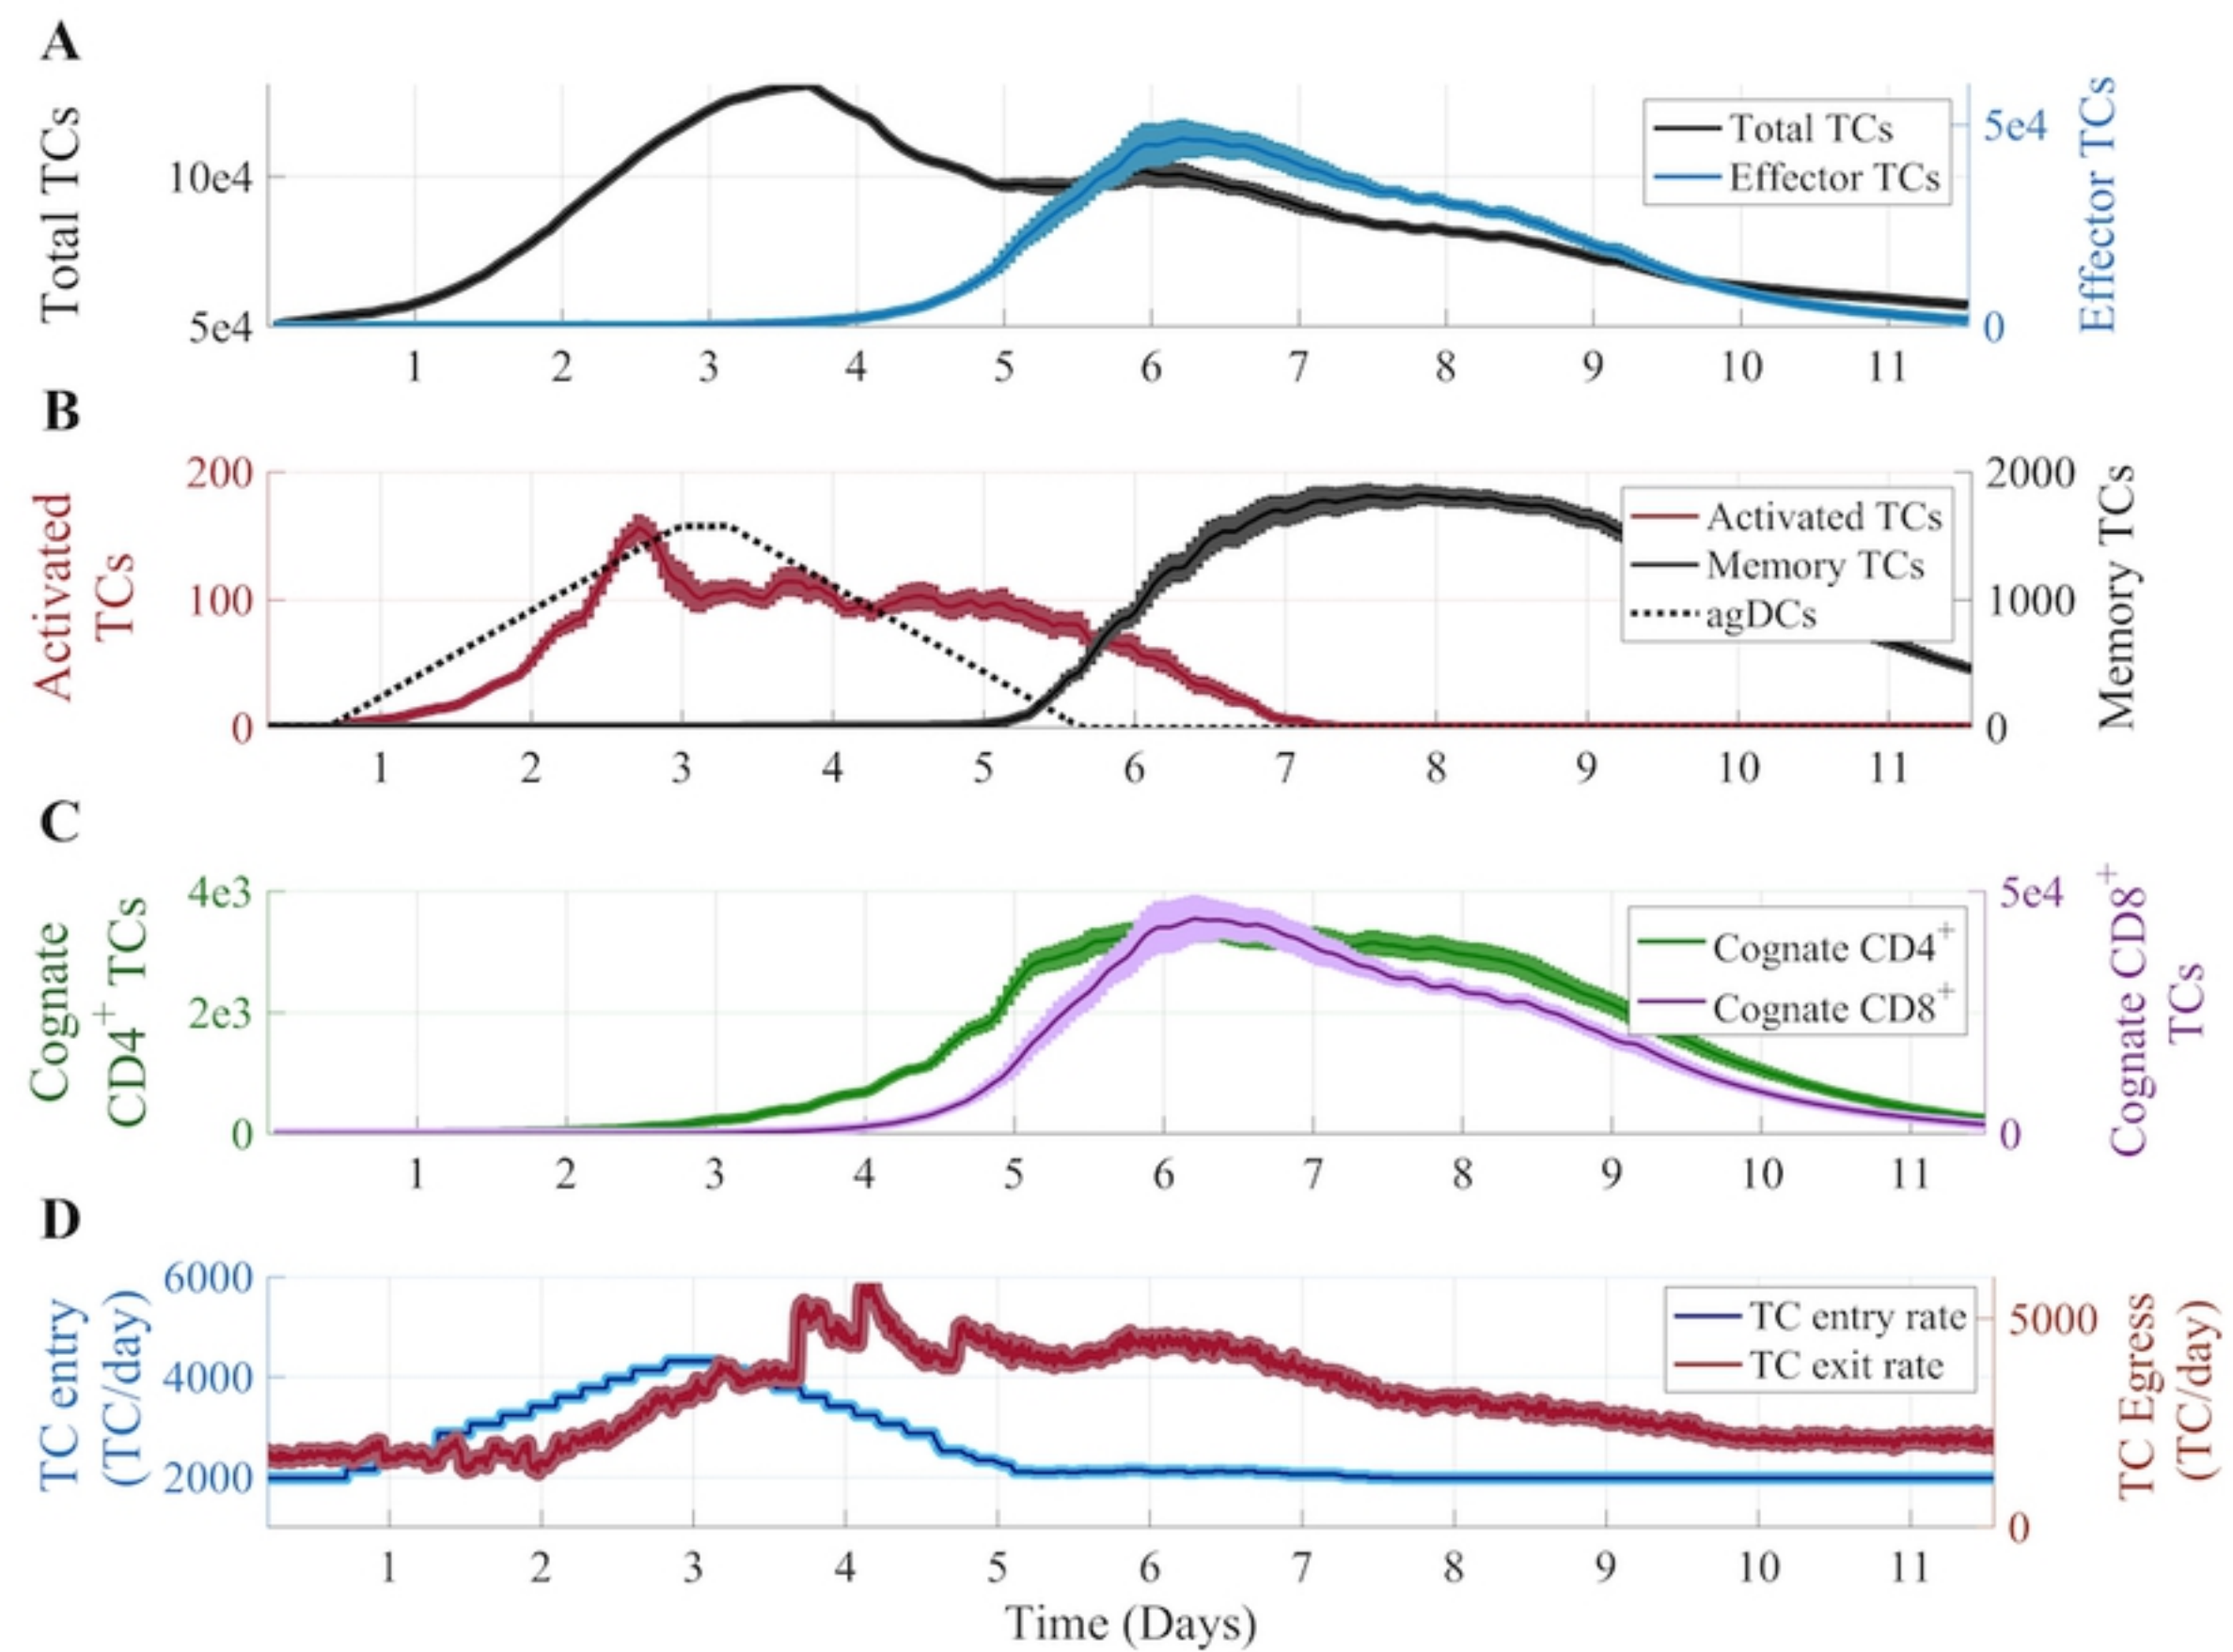

Figure\_5

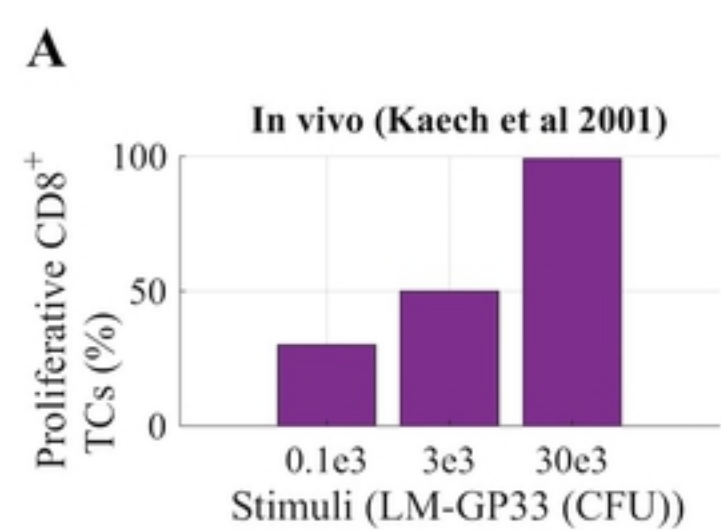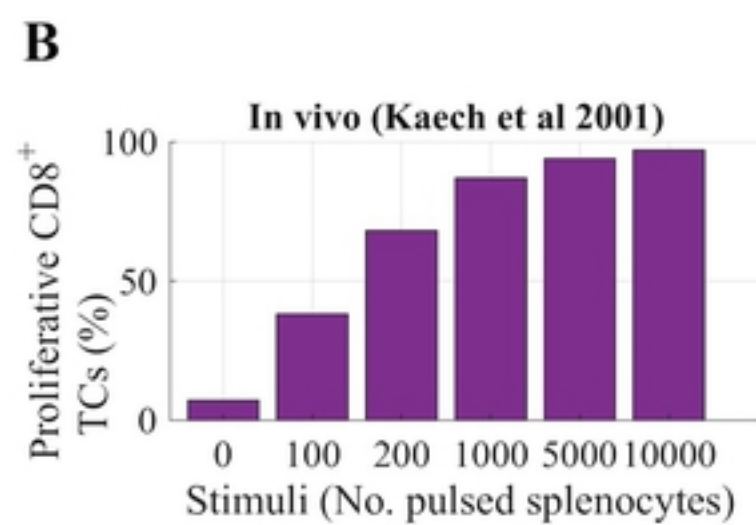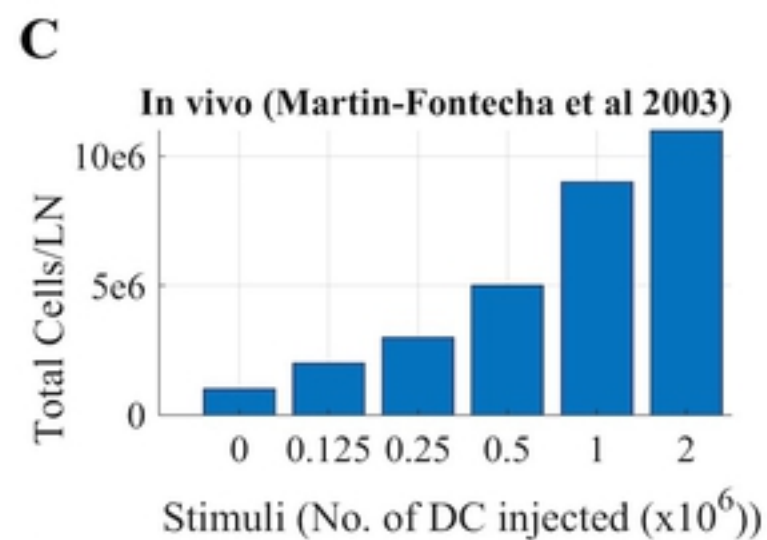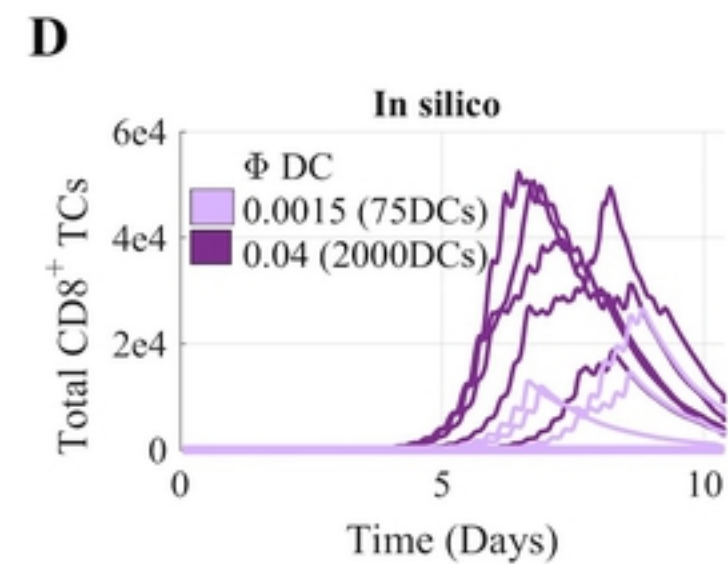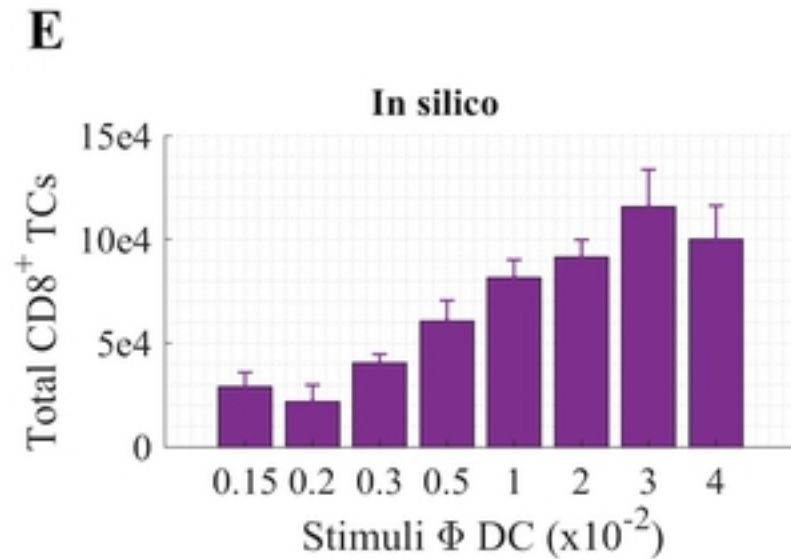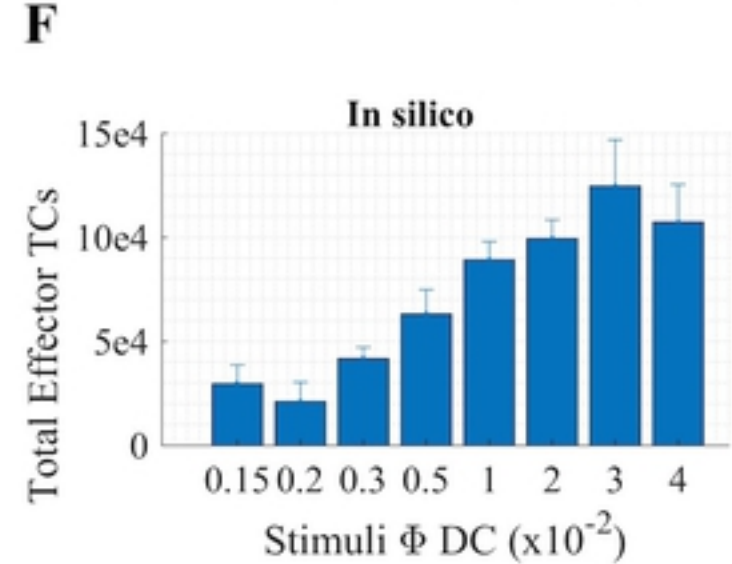

Figure\_6

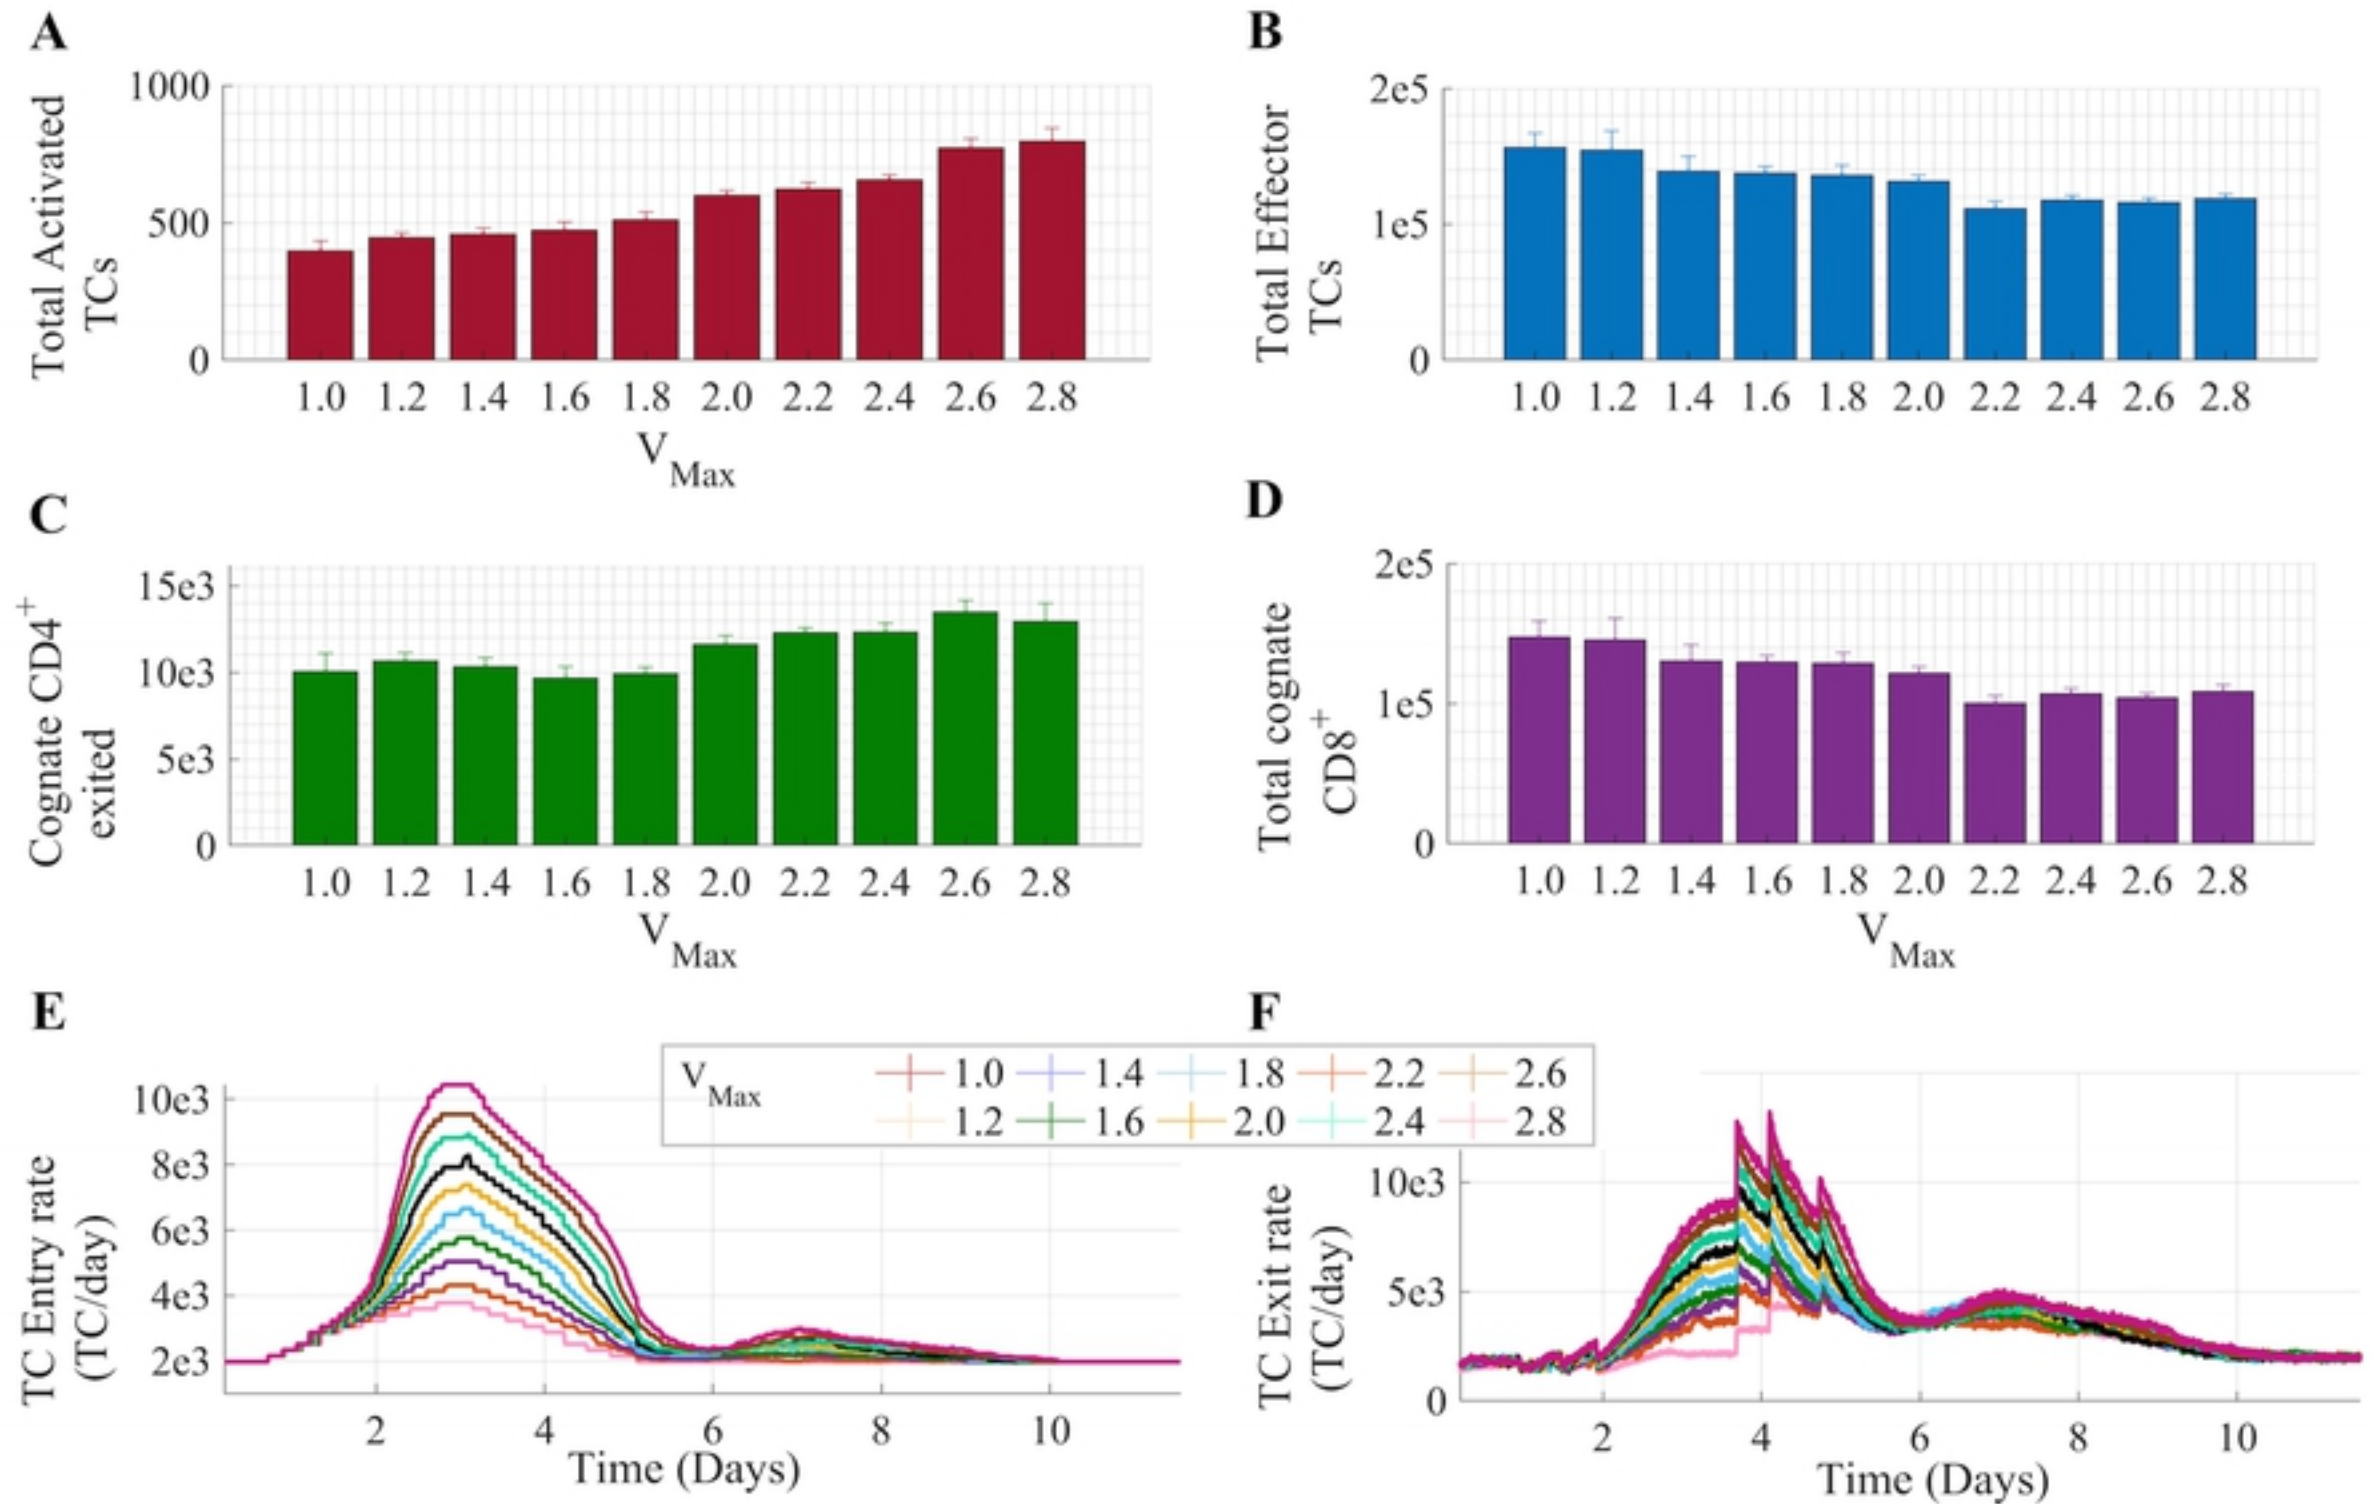

Figure\_7



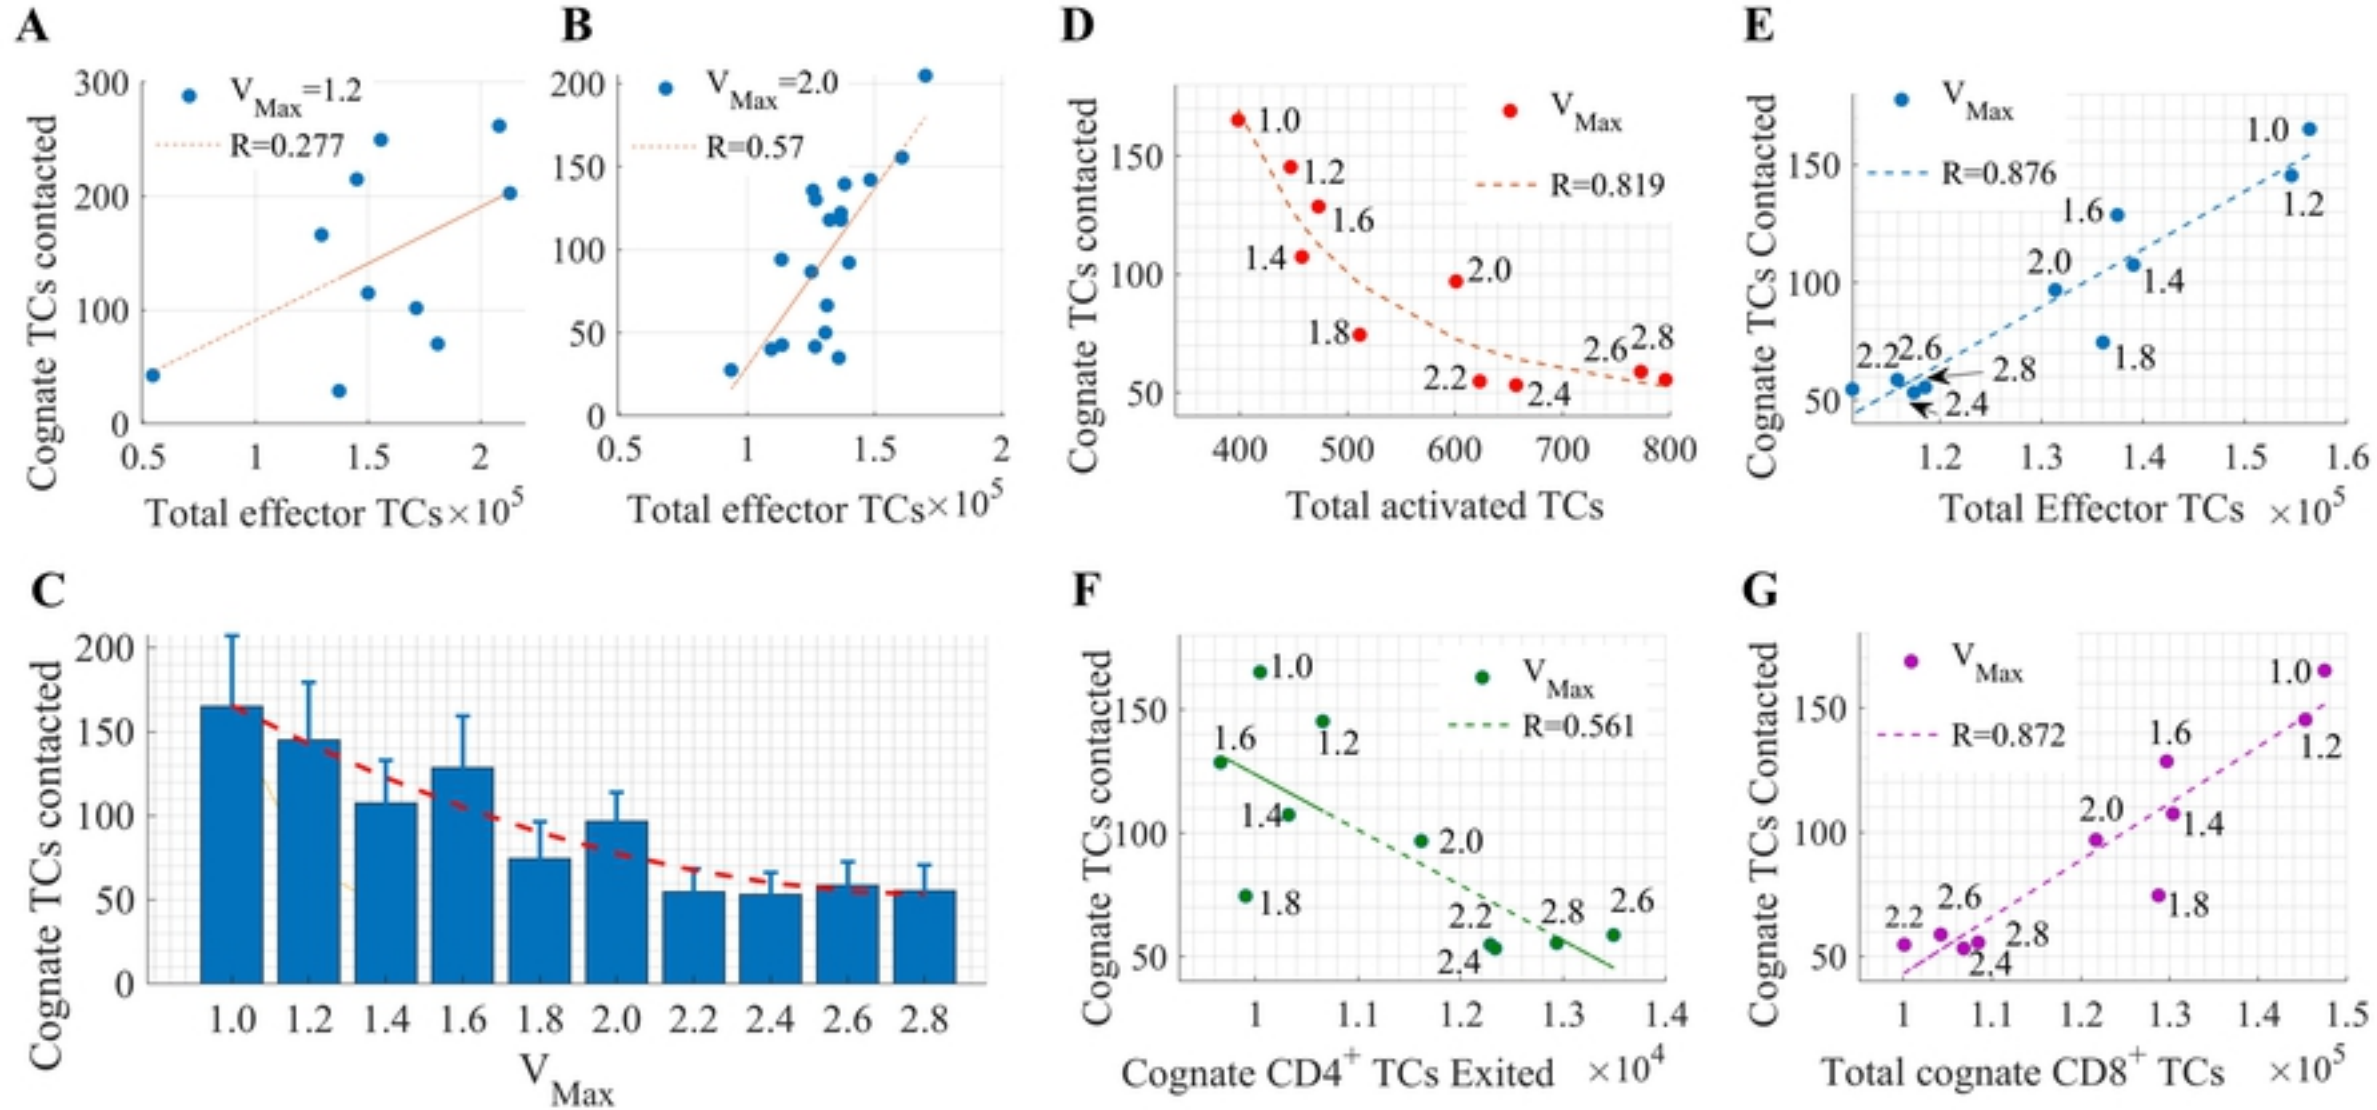

Figure\_8

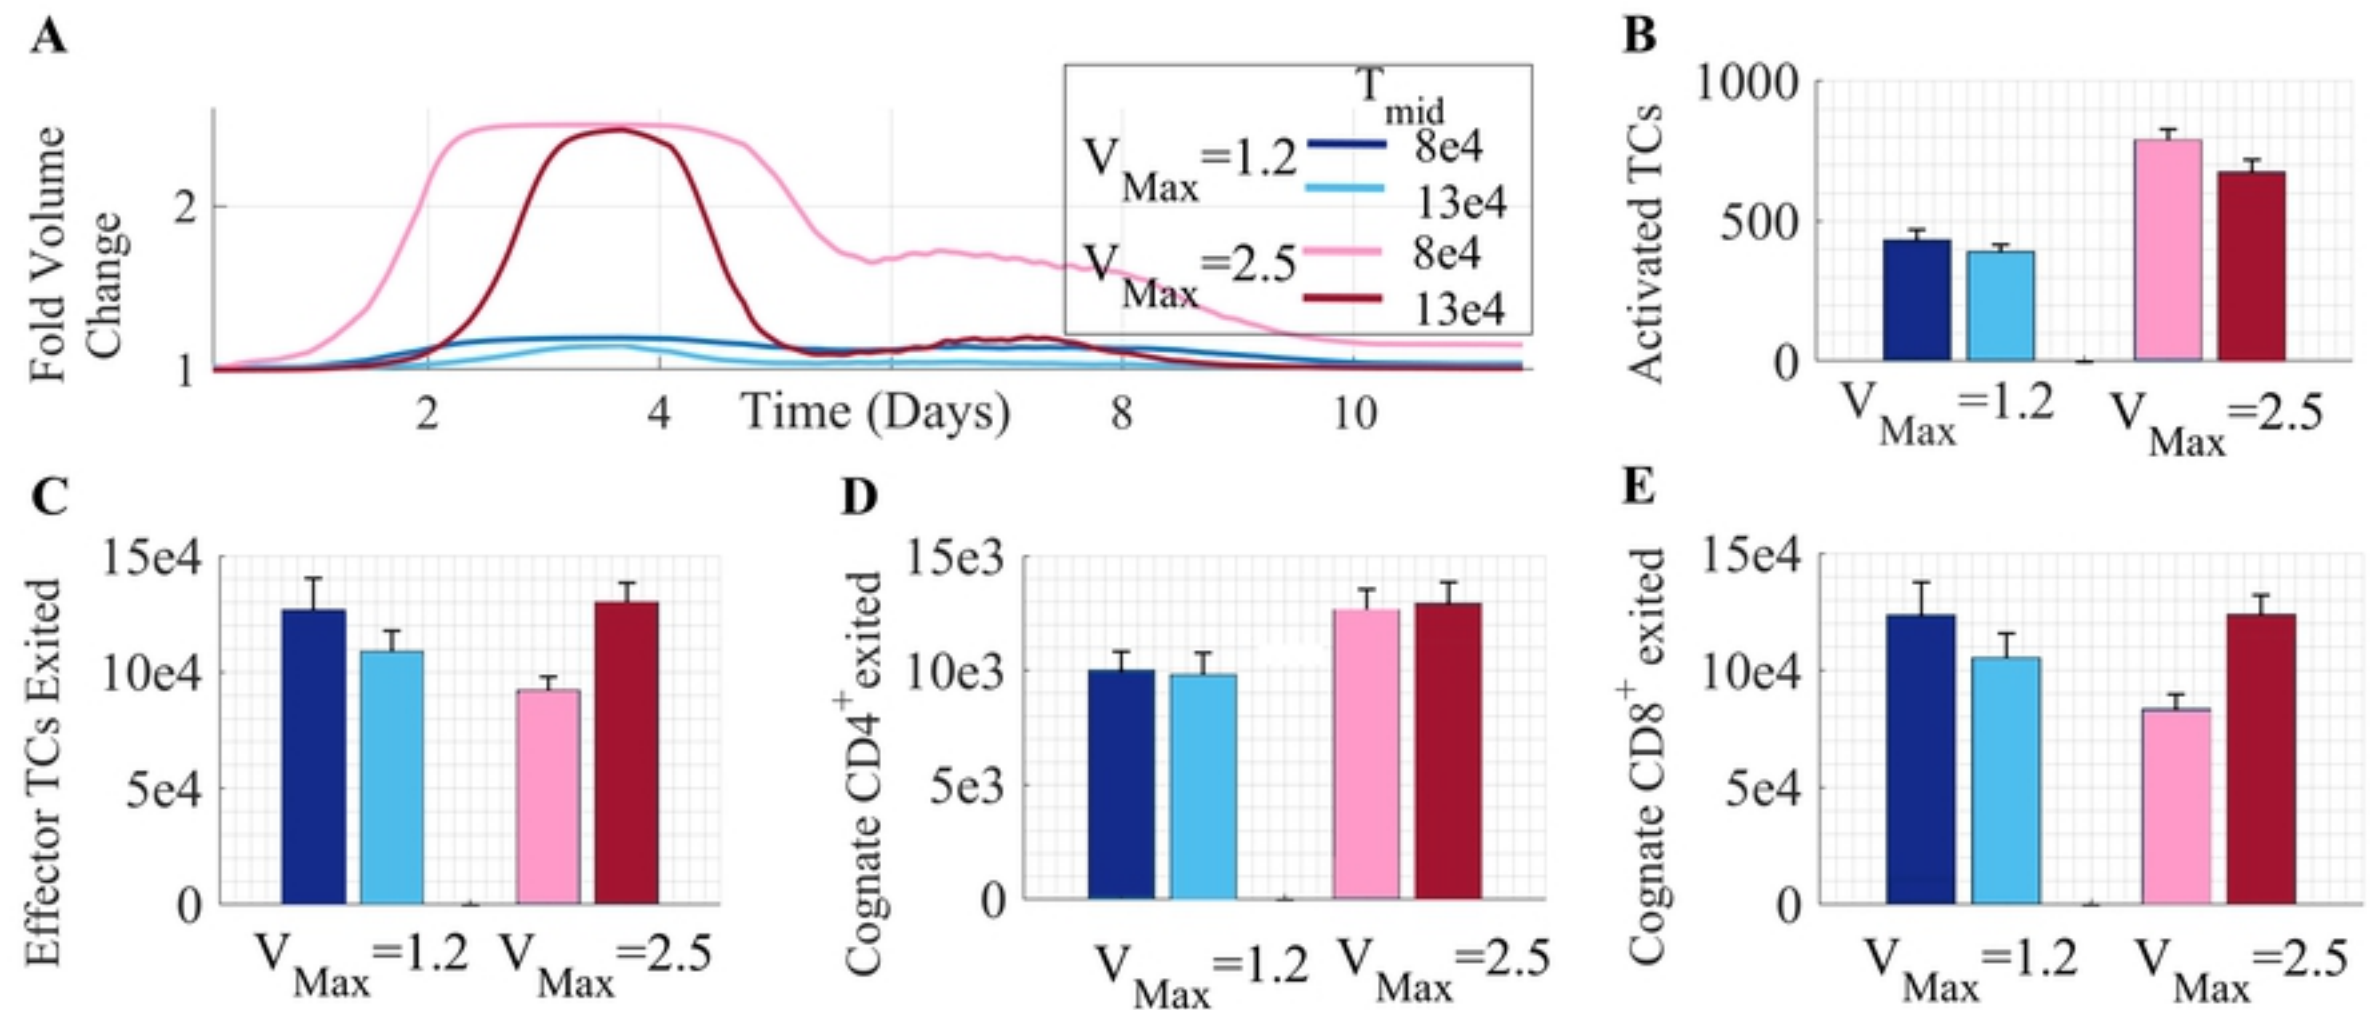

Figure\_9

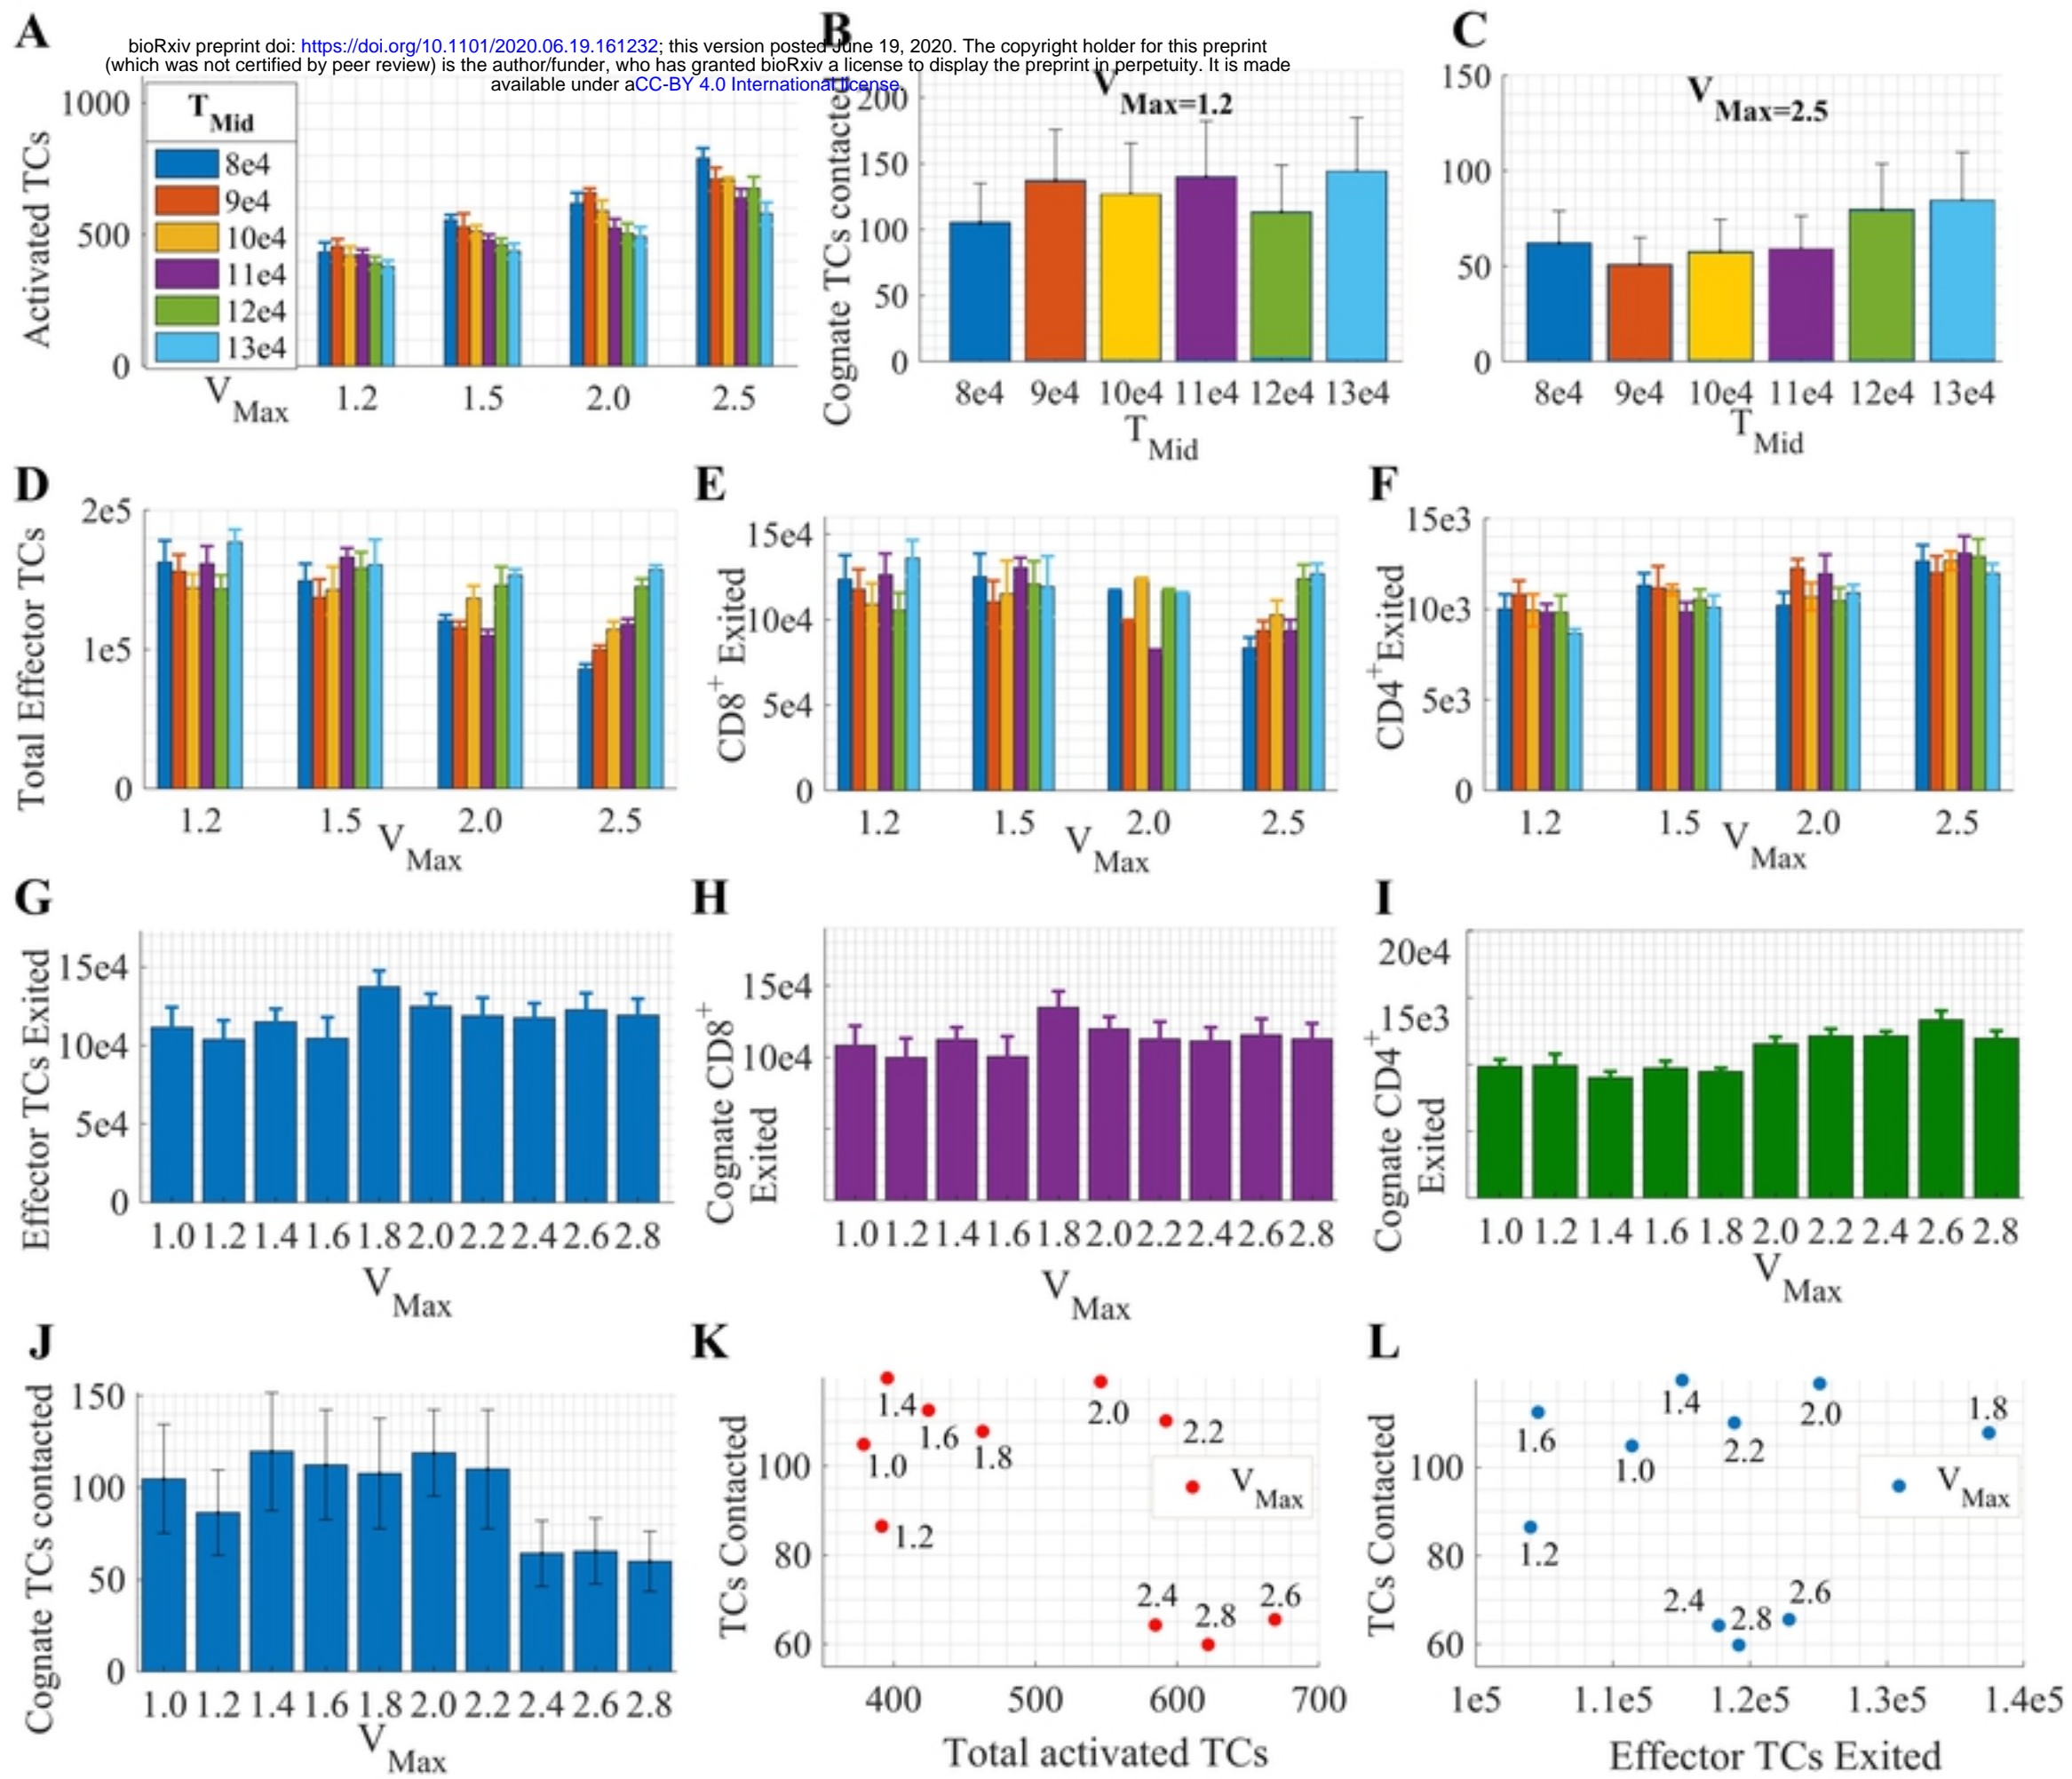

Figure\_10



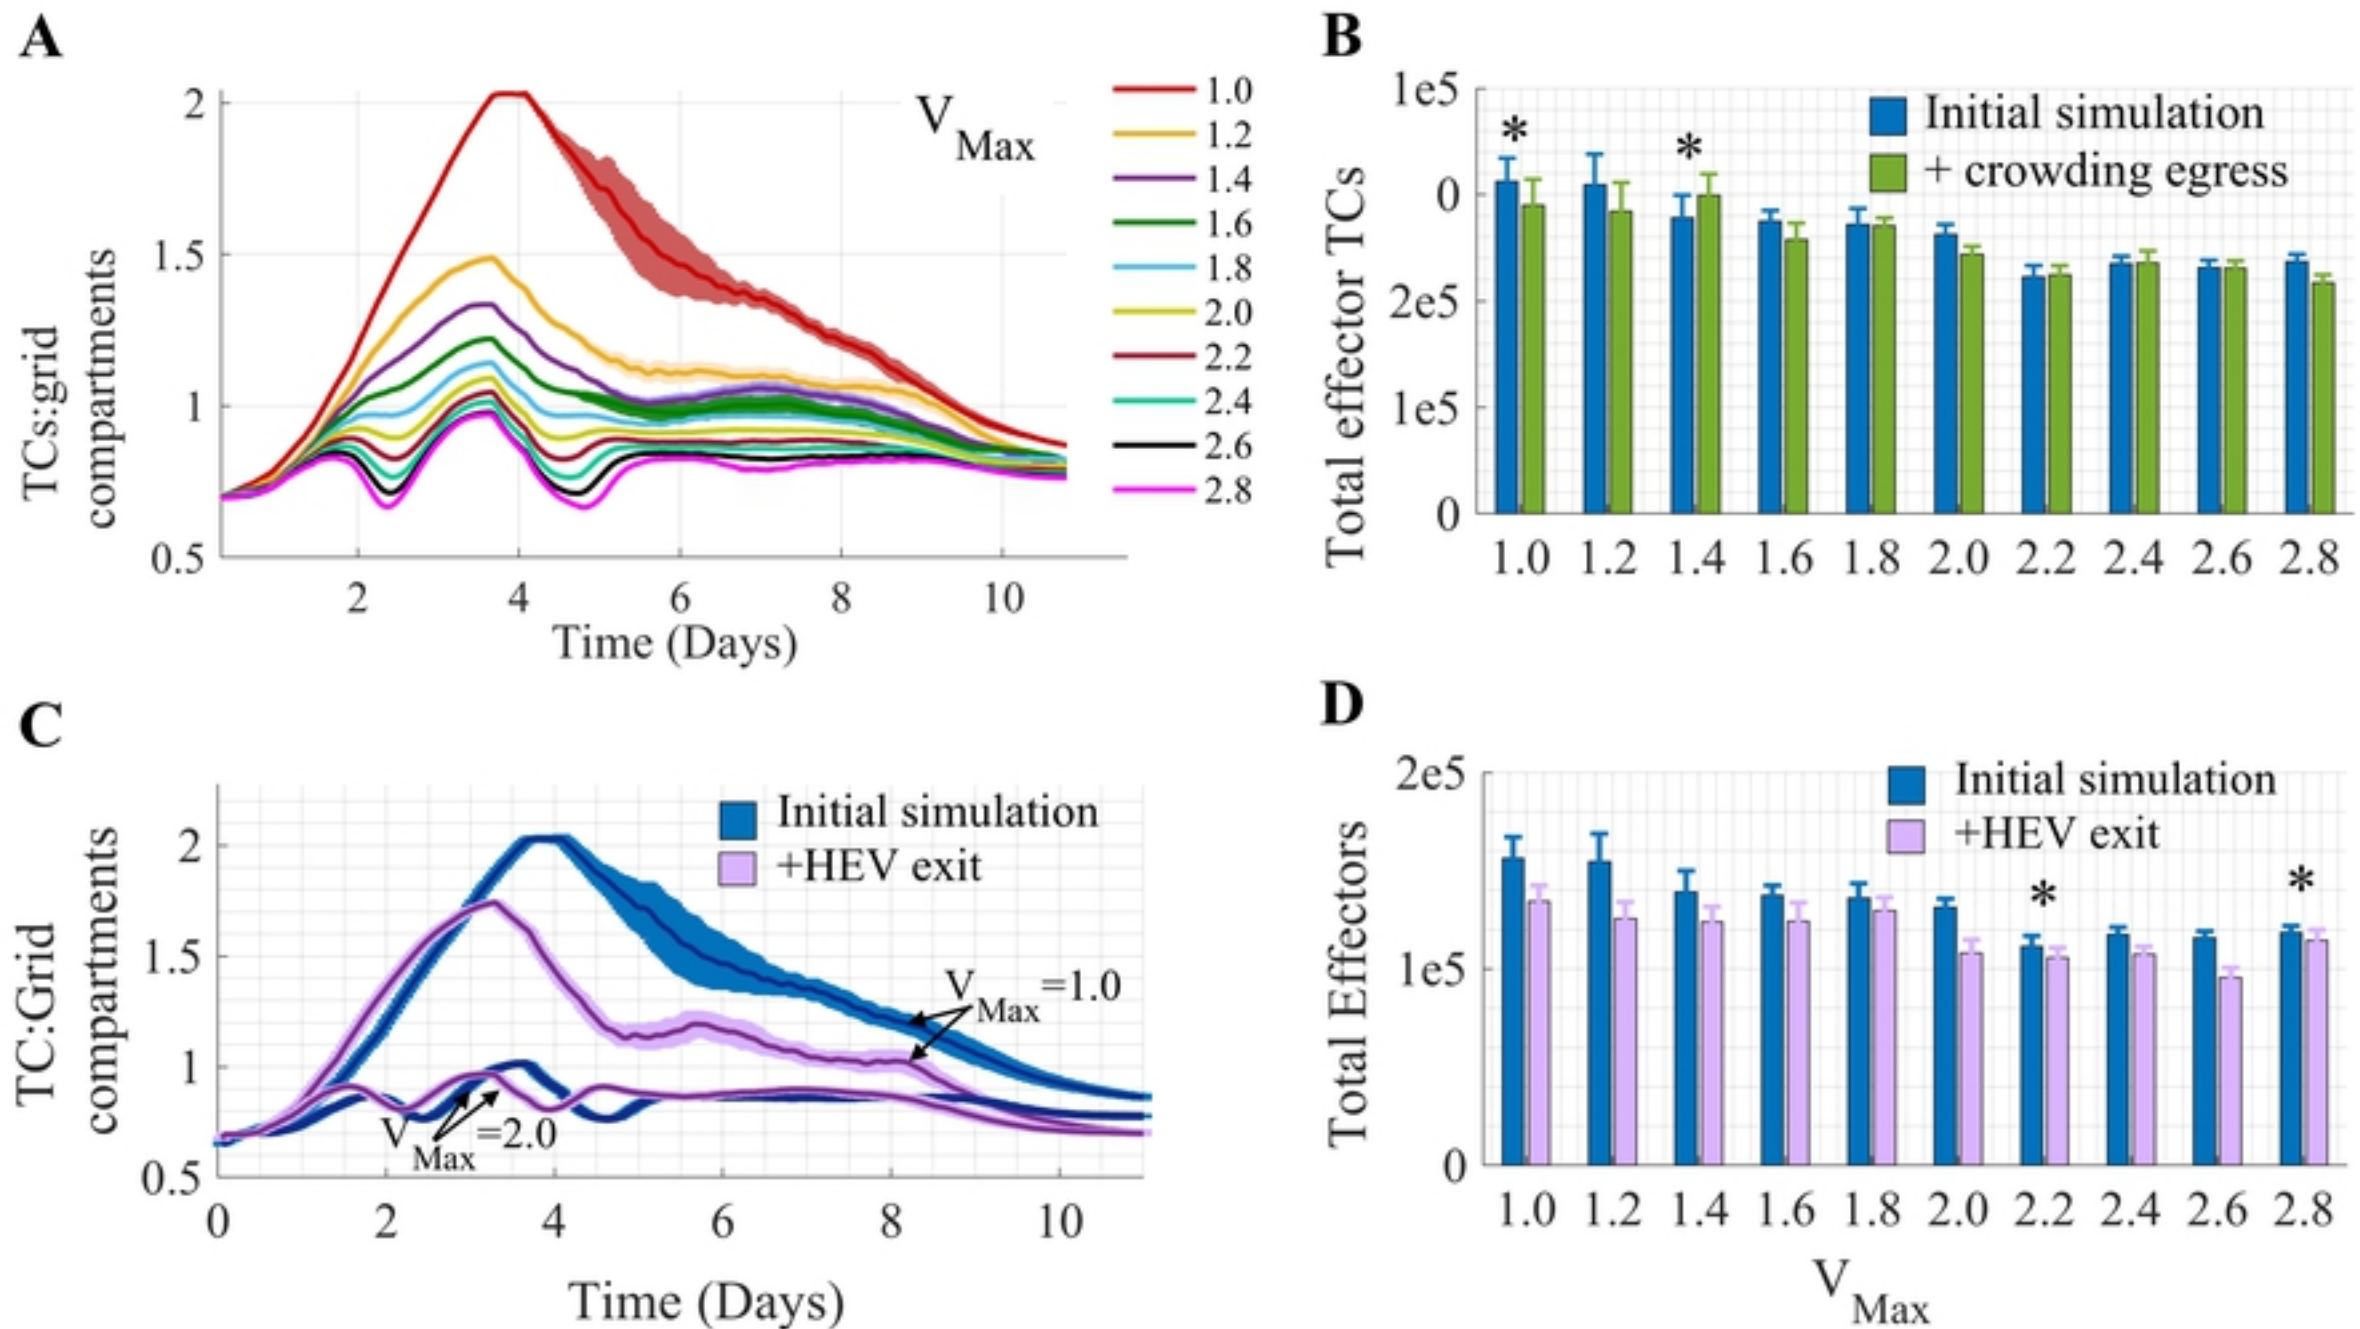

Figure\_11



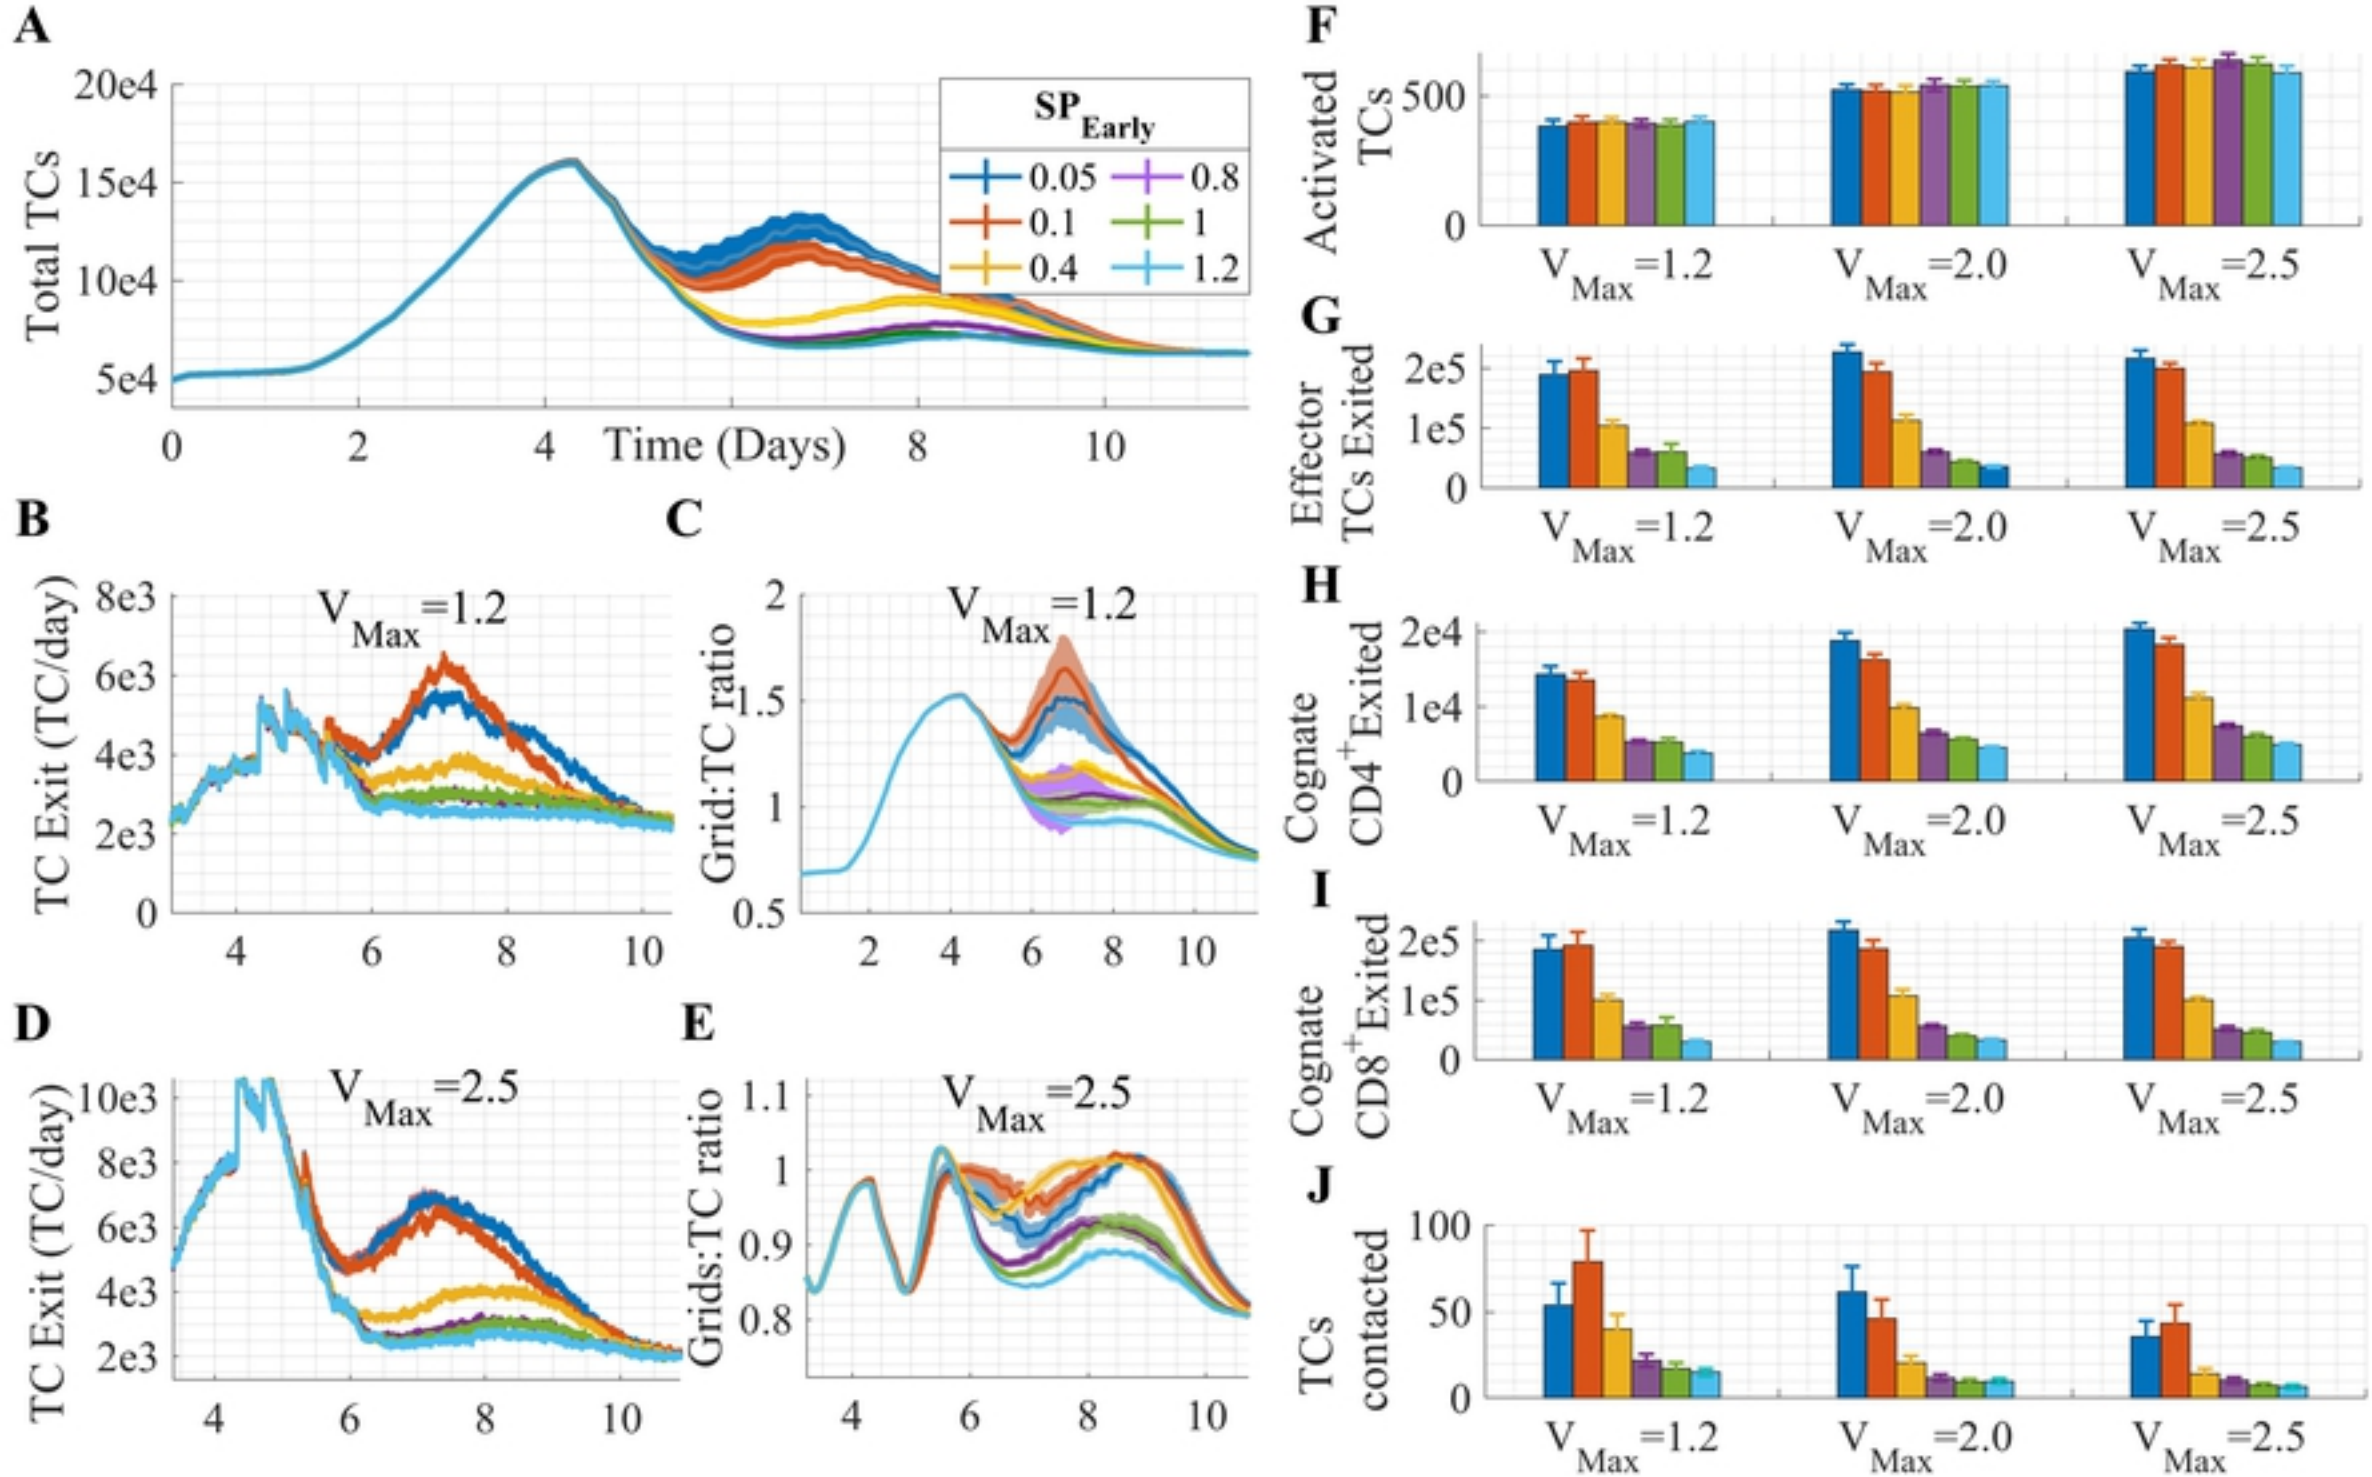

Figure\_12
